1           **Dramatic changes in mitochondrial substrate use at critically high temperatures:**  
2                           **a comparative study using *Drosophila***

3    *Lisa Bjerregaard Jørgensen*<sup>1\*</sup>, *Johannes Overgaard*<sup>1</sup>, *Florence Hunter-Manseau*<sup>2</sup> & *Nicolas Pichaud*<sup>2</sup>

4  
5    <sup>1</sup> *Zoophysiology, Department of Biology, Aarhus University, 8000 Aarhus C, Denmark*

6    <sup>2</sup> *Department of Chemistry and Biochemistry, Université de Moncton, Moncton, NB, E1A 3E9, Canada*

7    \* *Author for correspondence ([lbj@bio.au.dk](mailto:lbj@bio.au.dk)) (LBJ)*

8  
9  
10 Running title: Mitochondrial flexibility in heat stress

11 Keywords: *Complex I, Mitochondrial flexibility, Glycerol-3-phosphate dehydrogenase, Substrate*  
12 *control, Thermal sensitivity, Thermal tolerance*

13 Summary statement:

14 *Drosophila* mitochondrial functions persist at temperatures above organismal heat limits but turn to  
15 oxidation of alternative substrates as complex I-supported respiration is impaired.

16 Abstract:

17 Ectotherm thermal tolerance is critical to species distribution, but at present the physiological  
18 underpinnings of heat tolerance remain poorly understood. Mitochondrial function is perturbed at  
19 critically high temperatures in some ectotherms, including insects, suggesting that heat tolerance of  
20 these animals is linked to failure of oxidative phosphorylation (OXPHOS) and/or ATP production.  
21 To test this hypothesis we measured mitochondrial oxygen consumption rates in six *Drosophila*  
22 species with different heat tolerance using high-resolution respirometry. Using a substrate-  
23 uncoupler-inhibitor titration protocol we examined specific steps of the electron transport system to  
24 study how temperatures below, bracketing and above organismal heat limits affected mitochondrial  
25 function and substrate oxidation. At benign temperatures (19 and 30°C), complex I-supported  
26 respiration (CI-OXPHOS) was the most significant contributor to maximal OXPHOS. At higher  
27 temperatures (34, 38, 42 and 46°C), CI-OXPHOS decreased considerably, ultimately to very low  
28 levels at 42 and 46°C. The enzymatic catalytic capacity of complex I was intact across all  
29 temperatures and accordingly the decreased CI-OXPHOS is unlikely to be caused directly by  
30 hyperthermic denaturation/inactivation of complex I. Despite the reduction in CI-OXPHOS,  
31 maximal OXPHOS capacities were maintained in all species, through oxidation of alternative  
32 substrates; proline, succinate and, particularly, glycerol-3-phosphate, suggesting important  
33 mitochondrial flexibility at temperatures exceeding the organismal heat limit. Interestingly, this  
34 compensatory oxidation of alternative substrates occurred at temperatures that tended to correlate  
35 with species heat tolerance, such that heat-tolerant species could defend “normal” mitochondrial  
36 function at higher temperatures than sensitive species. Future studies should investigate why CI-  
37 OXPHOS is perturbed and how this potentially affects ATP production rates.

38 **Abbreviations**

- 39 acetyl CoA: acetyl Coenzyme A  
40 ADP: adenosine diphosphate  
41 ATP: adenosine triphosphate  
42 asc: ascorbate  
43 cG3PDH: cytoplasmic glycerol-3-phosphate dehydrogenase  
44 CI: complex I (NADH:ubiquinone oxidoreductase)  
45 CII: complex II (succinate dehydrogenase)  
46 CIII: complex III (coenzyme Q:cytochrome *c* oxidoreductase)  
47 CIV: complex IV (cytochrome *c* oxidase)  
48 CS: citrate synthase  
49 CT<sub>max</sub>: Critical thermal maximum  
50 CV: complex V (ATP synthase)  
51 Cyt *c*: cytochrome *c*  
52 DHAP: dihydroxyacetone phosphate  
53 ETS: electron transport system  
54 ETS<sub>max</sub>/OXPHOS<sub>max</sub>: non-coupled ratio  
55 FADH<sub>2</sub>: flavin adenine dinucleotide  
56 FCCP: carbonyl cyanide-4-(trifluoromethoxy)phenylhydrazone  
57 G3P: glycerol-3-phosphate  
58 GAP: glyceraldehyde-3-phosphate  
59  $j_{\approx P}$ : OXPHOS coupling efficiency  
60 LEAK: non-coupled (to phosphorylation) respiration  
61 mtG3PDH: mitochondrial glycerol-3-phosphate dehydrogenase  
62 MPC: mitochondrial pyruvate carrier  
63 NADH: nicotinamide adenine dinucleotide  
64 OCLTT: oxygen- and capacity-limited thermal tolerance  
65 OXPHOS: oxidative phosphorylation  
66 PDH: pyruvate dehydrogenase  
67 ProDH: proline dehydrogenase  
68 Q: ubiquinone pool  
69 ROX: residual oxygen consumption  
70 saz: sodium azide  
71 SCR: substrate contribution ratio  
72 TMPD: (N,N,N',N'-tetramethyl-p-phenylenediamine)

## 73 **Introduction**

74 The body temperature of ectotherms is closely associated with the temperature of their environment.  
75 Accordingly, organismal resistance to temperature effects, i.e. thermal tolerance, is an important  
76 trait in shaping the biogeographic distribution of ectotherm species, including insects (Addo-  
77 Bediako et al., 2000; Kellermann et al., 2012; Sunday et al., 2019). With projections of increasing  
78 average temperatures as well as the frequency and intensity of extreme temperature events through  
79 climate change (IPCC, 2014), much effort has been put into using characterisation of species heat  
80 tolerance to predict global changes in species distribution (Kingsolver et al., 2013; Sunday et al.,  
81 2012). Yet, the physiological shortcomings underlying the loss of function and mortality associated  
82 with heat stress are still not fully understood for insects (for reviews see Bowler (2018), González-  
83 Tokman et al. (2020) and Neven (2000)).

84 Some physiological and cellular mechanisms often listed as potential contributors to heat  
85 mortality in insects and other ectotherms are inactivation and denaturation of proteins, temperature  
86 effects on membrane organisation, unaligned temperature sensitivities ( $Q_{10}$ ) of coupled biochemical  
87 reactions as well as insufficient oxygen supply in line with mismatched ATP demand and supply  
88 (Hochachka and Somero, 2002; Schmidt-Nielsen, 1990). For terrestrial insects there is little  
89 evidence to suggest that deficient oxygen supply to the respiring cells is a cause of heat mortality  
90 (Klok, 2004; Mölich et al., 2013; Verberk et al., 2015). For example, it is rarely found that moderate  
91 hypoxia or hyperoxia alters heat tolerance as would be expected by the OCLTT (oxygen- and  
92 capacity-limited thermal tolerance) hypothesis (see Verberk et al. (2015)). However, this general  
93 finding does not exclude the possibility that exposure to extreme temperatures challenges  
94 mitochondrial function and their ability to produce ATP via the oxidative phosphorylation process  
95 (OXPHOS), which is also discussed in a recent review of the literature on mitochondria and  
96 ectotherm thermal limits (Chung and Schulte, 2020).

97 Metabolic demand increases with temperature and to maintain cellular homeostasis the rate  
98 of mitochondrial aerobic respiration must keep pace (Blier et al., 2014; Schulte, 2015).  
99 Accordingly, thermal sensitivity of mitochondria has been suggested to be important for thermal  
100 tolerance and thermal adaptations of mitochondrial functions have been observed in several  
101 ectothermic phyla (Chung et al., 2018; Ekström et al., 2017; Fanguie et al., 2009; Harada et al.,  
102 2019; Havird et al., 2020; Hraoui et al., 2020; Hunter-Manseau et al., 2019; Iftikar et al., 2010;  
103 Iftikar et al., 2014; Kake-Guena et al., 2017; Martinez et al., 2016, see also Chung and Schulte,

104 2020). Most mitochondrial studies addressing the effects of high temperature in ectotherms have  
105 focused on aquatic invertebrates or fish, while only a few studies have used insects, even though  
106 they comprise > 70% of all animal species (Stork, 2018) and have the most rapidly contracting  
107 muscles in nature (Beenackers et al., 1984; Candy et al., 1997) (but see Chamberlin (2004), Pichaud  
108 et al. (2010; 2011; 2012; 2013) and references below for studies on insect mitochondrial function).  
109 In insect flight muscle, mitochondrial respiration and ATP turnover may increase hundredfold when  
110 transitioning from rest to flight (Davis and Fraenkel, 1940; Krogh and Weis-Fogh, 1951; Weis-  
111 Fogh, 1964), and up to 20-fold in *Drosophila* (Chadwick and Gilmour, 1940). Hence, to sustain this  
112 intense activity, insect flight muscle metabolism must be extremely flexible. To our knowledge the  
113 most comprehensive investigation of the association between insect heat tolerance and  
114 mitochondrial function is a series of studies led by Bowler and co-workers on blowflies. Here, the  
115 authors described how flight muscle mitochondria isolated from blowflies that had been exposed to  
116 sublethal heat stress *in vivo* displayed impaired mitochondrial function (Bowler and Kashmeery,  
117 1981; Davison and Bowler, 1971), and that the organismal recovery from heat exposure (indicated  
118 by regained flight ability) was closely associated with the restoration of mitochondrial respiration  
119 (Bowler and Kashmeery, 1979; Davison and Bowler, 1971). Similarly, increased organismal heat  
120 tolerance induced by a heat shock treatment was found to mitigate damage to mitochondrial  
121 function from subsequent sublethal heat stress both *in vivo* and *in vitro* (El-Wadawi and Bowler,  
122 1995). Substantial evidence suggests that mitochondrial oxygen consumption continues beyond the  
123 thermal threshold of movement ( $CT_{max}$ ) (Heinrich et al., 2017; Mölich et al., 2013), which is also  
124 supported by the blowfly studies, but an important conclusion is that the coupled reactions in  
125 mitochondria are challenged around the organismal heat limits (El-Wadawi and Bowler, 1996).  
126 Specifically, the latter study on blowfly flight muscle indicated that complex I could be the site of  
127 mitochondrial heat damage following a sublethal heat exposure.

128 In a recent study, we characterised heat tolerance of 11 *Drosophila* species representing a  
129 wide array of ecotypes and found pronounced differences in species heat tolerance which was  
130 closely related to the temperature of their current distribution (Jørgensen et al., 2019). In the present  
131 study we use a subset of this comparative system to ask: 1) whether and how high temperature  
132 affects mitochondrial functions in *Drosophila*, and 2) if heat-induced changes in mitochondrial  
133 functions are correlated to organismal heat tolerance. Previous studies on mitochondrial function  
134 and temperature relations in *Drosophila* have focused on genetic components (mitochondrial  
135 haplotypes) and were measured at less stressful high temperatures (up to 28°C) where organismal

136 function is easily maintained (Pichaud et al. (2010; 2011; 2012; 2013)). In contrast, the present  
137 study examined effects of high temperature on the electron transport system (ETS) in six species of  
138 *Drosophila* representing low, intermediate and high heat tolerance at temperatures approaching and  
139 surpassing the lethal limit (19-46°C). This was examined in permeabilized thoraces using high-  
140 resolution respirometry to measure multiple steps of the ETS during OXPHOS and non-coupled  
141 respiration. To specifically address the role of complex I as the site of heat damage (El-Wadawi and  
142 Bowler, 1996), we investigated if complex I-supported OXPHOS diminished at high temperatures,  
143 and examined if other components of the ETS compensated under these circumstances, attesting to  
144 mitochondrial flexibility during heat stress in *Drosophila*. Finally, we measured *in vitro* activity of  
145 mitochondrial enzymes related to complex I substrate oxidation (pyruvate dehydrogenase, citrate  
146 synthase and complex I enzymatic activities) to examine if changes in mitochondrial function were  
147 directly related to collapse of protein function.

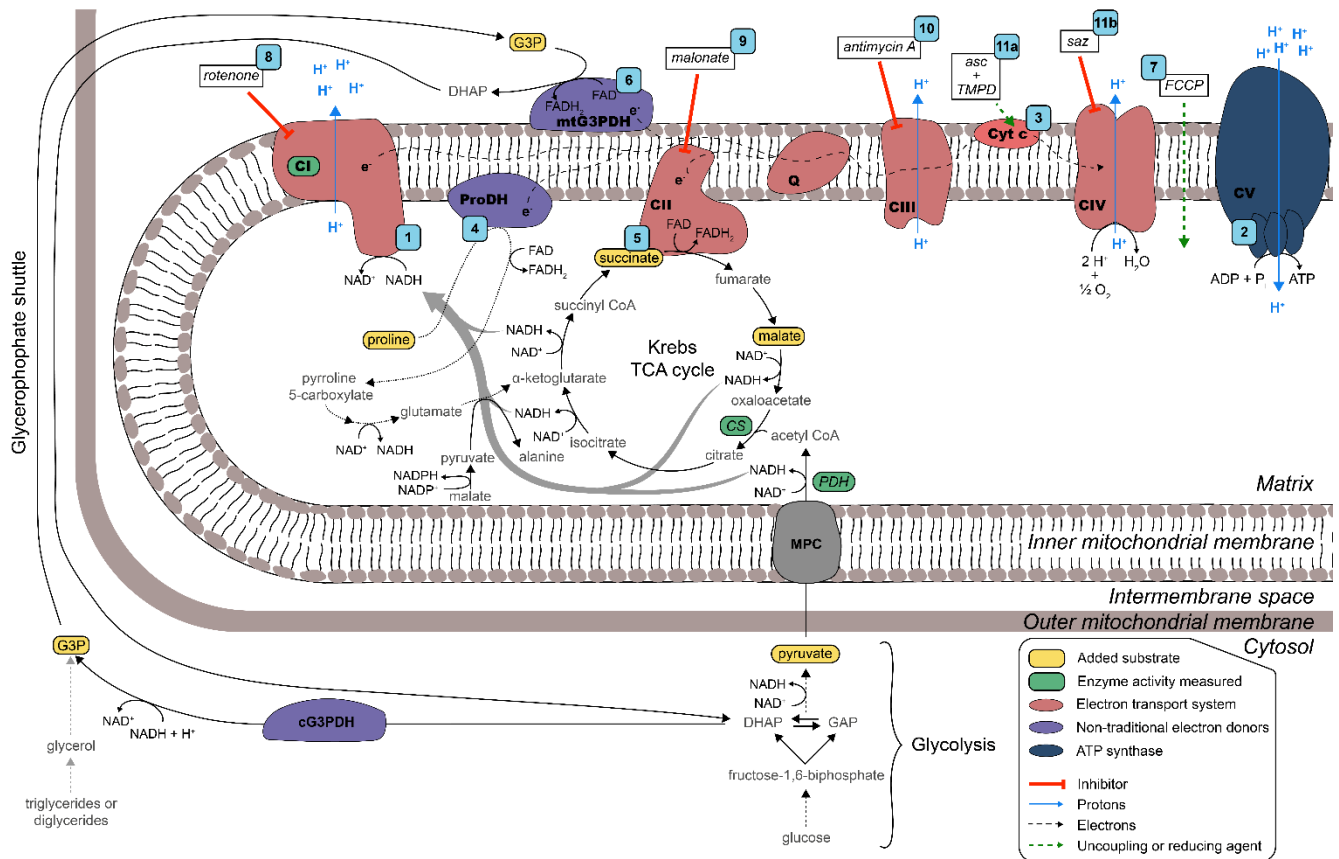

148 *Fig. 1 Overview of mitochondrial metabolism and the substrate-uncoupler-inhibitor titration*  
 149 *(SUIT) protocol used in the present study. Numbered blue squares refer to steps in the SUIT*  
 150 *protocol (also referenced in Materials and methods). In the cytosol, glycolysis transforms glucose*  
 151 *into pyruvate which is then transported to the mitochondrial matrix by the mitochondrial pyruvate*  
 152 *carrier (MPC). In the matrix, pyruvate dehydrogenase (PDH) transforms pyruvate into acetyl CoA*  
 153 *and reduces NAD<sup>+</sup> to NADH. Acetyl CoA, which can also be produced by fatty acid oxidation,*  
 154 *enters the tricarboxylic acid (TCA) cycle where it participates in condensation with oxaloacetate to*  
 155 *form citrate by citrate synthase (CS). The NADH reducing equivalents formed through the TCA*  
 156 *cycle and PDH activity are used by complex I (CI) to transfer protons from the matrix to the*  
 157 *intermembrane space. Succinate, a TCA cycle intermediate, is oxidized by complex II (CII) which*  
 158 *transfers electrons to the ubiquinone (Q) pool via FADH<sub>2</sub>. Proline, a non-traditional electron donor*  
 159 *used by some insects, is fueling proline dehydrogenase (ProDH) which transfers electrons directly*  
 160 *to the Q pool but can also act as a carbon source and thus replenish the TCA cycle (anaplerotic*  
 161 *function, dotted arrows). Glycerol-3-phosphate (G3P), derived from lipid catabolism or*  
 162 *transformation of dihydroxyacetone phosphate (DHAP) from glycolysis, is shuttled into the*  
 163 *intermembrane space where the mitochondrial glycerol-3-phosphate dehydrogenase (mtG3PDH)*

164 *reduces the coenzyme FAD and donates electrons to the Q pool. Electrons from upstream*  
165 *complexes in the electron transport system (ETS) converge to the Q pool and subsequently go*  
166 *through complex III (CIII), where protons are pumped to the intermembrane space, and then via*  
167 *cytochrome c (Cyt c) to complex IV (CIV) where molecular oxygen is used as the final electron*  
168 *acceptor and protons are pumped to the intermembrane space. The proton gradient that is formed*  
169 *by the ETS is used by the ATP synthase (complex V, CV) to form ATP through phosphorylation of*  
170 *ADP.*

## 171 **Materials and methods**

### 172 Experimental animals

173 The present study used six species of *Drosophila* that we previously characterised with respect to  
174 heat tolerance (Jørgensen et al., 2019). The species are listed here with increasing level of heat  
175 tolerance and the temperature reported to cause knockdown after a 1-hour exposure; *D. immigrans*,  
176 Sturtevant 1921 (35.4°C); *D. subobscura*, Collin 1936 (35.6°C); *D. mercatorum*, Patterson and  
177 Wheeler 1942 (37.1°C); *D. melanogaster*, Meigen 1830 (38.3°C); *D. virilis*, Sturtevant 1916  
178 (38.8°C) and *D. mojavensis*, Patterson 1940 (41.2°C). Details on population origin can be found in  
179 Table 1 of Jørgensen *et al.* (2019). Flies were kept at Aarhus University (Aarhus, Denmark) for  
180 several years before shipping them to the Université de Moncton (Moncton, NB, Canada). Upon  
181 reception, flies were acclimated to their previous environmental conditions for about three months  
182 prior to the start of experiments (i.e. allowing multiple generations before use). Specifically, flies  
183 were maintained at 19°C with a diurnal cycle (12:12 LD) in 35-mL vials with approx. 15 mL oat-  
184 based Leeds medium (see Andersen et al. (2015)). Parental flies were moved to a fresh vial every 5-  
185 7 days to avoid excessive egg density, and newly eclosed flies were transferred to fresh vials every  
186 2-3 days. Only females 4-8 days post-eclosion were used for experiments.

### 187 Mitochondrial oxygen consumption in permeabilized thoraces

188 High-resolution respirometry was performed on permeabilized thoraces in the Oxygraph-O2K  
189 system (Oroboros Instruments, Innsbruck, Austria) using a protocol for *Drosophila* based on  
190 Simard *et al.* (2018). The steps for this protocol are outlined below.

#### 191 *Preparation of permeabilized thoraces*

192 All steps of the permeabilization protocol were performed on ice. Initially, flies were incapacitated  
193 on ice and females were then transferred to a petri dish where the thorax was separated from the



194 head and abdomen. Wings and legs were then removed using a razor blade and a pair of fine-tipped  
195 forceps. The number of thoraces required to achieve the target mass of 0.4-1 mg for each Oxygraph  
196 chamber was species specific, as size differs between species. For the larger species (*D. immigrans*,  
197 *D. subobscura*, *D. mercatorum* and *D. virilis*) two thoraces were used for each chamber, while three  
198 thoraces were prepared for the smaller *D. melanogaster* and *D. mojavensis*. Isolated thoraces were  
199 immediately transferred to a small Petri dish containing an ice-cold biological preservation solution  
200 (BIOPS; 2.77 mM CaK<sub>2</sub>EGTA, 7.23 mM K<sub>2</sub>EGTA, 5.77 mM Na<sub>2</sub>ATP, 6.56 mM MgCl<sub>2</sub>, 20 mM  
201 taurine, 15 mM Na<sub>2</sub>phosphocreatine, 20 mM imidazole, 0.5 mM dithiothreitol, 50 mM K-MES, pH  
202 7.1). Thoraces were mechanically permeabilized by delicately poking the tissue with fine-tipped  
203 forceps, and the thoraces were then incubated in BIOPS supplemented with 62.5 μg mL<sup>-1</sup> saponin  
204 (prepared daily) for 15 minutes on an orbital shaker (220 rpm) for chemical permeabilization. After  
205 15 minutes, the thoraces were transferred to ice-cold respiration medium (RESPI; 120 mM KCl, 5  
206 mM KH<sub>2</sub>PO<sub>4</sub>, 3 mM HEPES, 1 mM MgCl<sub>2</sub>, 1 mM EGTA, adjusted to pH 7.2 then added 0.2 %  
207 BSA (w/v)), and incubated for 5 minutes on the orbital shaker (220 rpm) to wash out saponin.  
208 Prepared thoraces were gently dry-blotted on a Kimwipe to remove excess RESPI solution and  
209 weighed (Secura 225D-1s semi-micro balance (0.01 mg) or Cubis MSE6.6S-000-DM micro balance  
210 (0.001 mg), Sartorius, Göttingen, Germany) before they were returned to a droplet of RESPI  
211 medium placed on parafilm over ice, such that each RESPI droplet contained the permeabilized  
212 thoraces for a single chamber.

### 213 *Oxygen consumption rates*

214 Mitochondrial oxygen consumption was measured at six different temperatures: 19°C (acclimation  
215 temperature), 30, 34, 38, 42 and 46°C to cover both benign and extreme temperatures for all  
216 species. The Oxygraph chambers were set to the assay temperature prior to air calibration, then  
217 filled with 2.3 mL RESPI medium and the stoppers were fully inserted to avoid air bubbles. Excess  
218 RESPI was aspirated, the stoppers were lifted using the spacer, and the system was allowed at least  
219 45 min with stirring (750 rpm) to equilibrate with the gas phase (air) and stabilise the oxygen  
220 concentration dissolved in the medium (solubility decreasing with increasing temperature). When  
221 the oxygen signal was stable (as per the recommended  $\pm 1$  pmol O<sub>2</sub> s<sup>-1</sup> mL<sup>-1</sup>), the system was  
222 calibrated relative to the barometric and water vapour pressure (DatLab, Version 6.1.0.7, Oroboros  
223 Instruments, Innsbruck, Austria).

224           Once the Oxygraph had been calibrated, a general substrate-uncoupler-inhibitor titration  
225 (SUIT) protocol was employed to measure mitochondrial oxygen consumption at specific steps of  
226 the ETS. These steps are described below and are also outlined in Fig. 1, which will be referred to  
227 in parentheses throughout the protocol. Concentrations reported here are calculated final  
228 concentrations in the 2-mL Oxygraph chamber. Measurements started with removing the chamber  
229 stopper and adding 10 mM pyruvate (prepared daily) and 2 mM malate (step 1) followed by the pre-  
230 weighed permeabilized thoraces. The oxygen concentration in the chamber was raised to ~150-175  
231 % air-saturation to avoid any oxygen diffusion limitation in the tissue, and the chambers were  
232 closed. When oxygen consumption rate was stable, this was taken as the LEAK respiration at the  
233 level of complex I (CI-LEAK), which is a non-phosphorylating respiration rate. Injection of 5 mM  
234 ADP (step 2) coupled the proton gradient created by electron transfer in complex I to  
235 phosphorylation of ADP to ATP (CI-OXPHOS). The integrity of the mitochondrial outer membrane  
236 was then examined by injecting 10  $\mu$ M cytochrome *c* (step 3). A disrupted mitochondrial outer  
237 membrane would allow the native cytochrome *c*, which is loosely associated with the exterior of the  
238 inner mitochondrial membrane, to escape the intermembrane space and subsequently limit the  
239 electron transfer between complex III and complex IV (i.e. limiting oxygen consumption).  
240 Accordingly, an injection of cytochrome *c* that results in increased oxygen consumption indicates a  
241 compromised outer mitochondrial membrane (likely due to the permeabilization), and preparations  
242 where oxygen consumption rate increased more than 15 % were discarded from the analysis  
243 (Kuznetsov et al., 2008).

244           Three additional substrates were added to sequentially stimulate different parts of the ETS.  
245 First, 5 mM proline was added as a substrate for proline dehydrogenase (ProDH, step 4) which  
246 transfers electrons to the Q-junction in the ETS (CI+ProDH-OXPHOS), followed by succinate (20  
247 mM, step 5), the substrate for complex II (succinate dehydrogenase, CI+ProDH+CII-OXPHOS).  
248 Finally, G3P (15 mM, *sn*-glycerol-3-phosphate) was injected (step 6), which is directly oxidized by  
249 the mitochondrial glycerol-3-phosphate dehydrogenase (mtG3PDH, CI+ProDH+CII+mtG3PDH-  
250 OXPHOS) that similarly feeds electrons to the Q-junction (Fig. 1).

251           Non-coupled respiration in which the proton gradient produced by the ETS is not coupled to  
252 oxidative phosphorylation, and thus indicates the maximal capacity of the ETS, was achieved by  
253 titrating the uncoupler FCCP (carbonyl cyanide 4-(trifluoromethoxy)phenylhydrazone, FCCP-ETS)  
254 in steps of 0.5-1  $\mu$ M (step 7). Next the complexes of the ETS were inhibited by injecting 0.5  $\mu$ M  
255 rotenone (complex I inhibitor, step 8), 5 mM malonate (complex II inhibitor, prepared daily, step 9)

256 and 2.5  $\mu$ M antimycin A (complex III, i.e. blocking the convergent electron transfer from the Q-  
257 junction, step 10) to measure the residual oxygen consumption (ROX). ROX was subtracted from  
258 all of the substrate-specific oxygen consumption rates to correct for oxygen used by non-  
259 mitochondrial oxidative side reactions (see Fig. S1).

260 The maximal capacity of complex IV (cytochrome *c* oxidase, CIV) for reducing oxygen to  
261 water was measured by adding ascorbate (2 mM) and the artificial substrate reducing cytochrome *c*,  
262 TMPD (N,N,N',N'-Tetramethyl-p-phenylenediamine, 0.5 mM) (step 11a). Briefly after the oxygen  
263 consumption rate had peaked, it started to decrease due to auto-oxidation of TMPD, and complex  
264 IV was immediately inhibited by injection of sodium azide (20 mM, step 11b). The maximal  
265 oxygen consumption rate of complex IV was corrected for the underlying auto-oxidation of TMPD  
266 by adjusting the slope used to calculate oxygen consumption in DatLab (Version 6.1.0.7, Oroboros  
267 Instruments, Innsbruck, Austria).

268 This SUIIT protocol typically took 50-55 minutes, from the time that the permeabilized  
269 thoraces were placed in the Oxygraph chambers to the signal stabilization after injection of the last  
270 inhibitor (sodium azide). All experiments described above were performed at Université de  
271 Moncton.

272 To examine the temperature sensitivity of electron transport through compartments of the  
273 ETS other than complex I, a modified SUIIT protocol was applied for additional measurements of  
274 oxygen consumption rates at 34 and 42°C. Here complex I was blocked with rotenone prior to  
275 injection of other substrates, and the CI substrates pyruvate and malate were omitted to minimise  
276 reverse electron transport through complex I (Murphy, 2009). Accordingly, the following injections  
277 were made (concentrations identical to the general SUIIT protocol); rotenone and succinate (CII-  
278 LEAK), ADP (CII-OXPHOS), cytochrome *c* (CIIc-OXPHOS), proline (CII+ProDH-OXPHOS),  
279 glycerol-3-phosphate (CII+ProDH+mtG3PDH-OXPHOS), FCCP (FCCP-ETS), malonate and  
280 antimycin A (ROX, subtracted from the other rates). This SUIIT protocol took about 45 minutes  
281 until the final injection. The measurements described in this section were performed at Aarhus  
282 University, along with additional “control” experiments using the full SUIIT protocol described  
283 above (not shown). Chemicals were purchased from Millipore-Sigma (Oakville, ON, Canada or  
284 Søborg, Denmark).

285

286 Analysis of respiration data

287 All oxygen consumption rates are here reported as means of mass-specific rates using the unit pmol  
288 O<sub>2</sub> s<sup>-1</sup> mg<sup>-1</sup> permeabilized thorax ± s.e.m.

289 In some experiments, oxygen consumption rate did not stabilise following the addition of  
290 ADP (CI-LEAK to CI-OXPHOS transition) but stabilised with the addition of subsequent substrates  
291 in the protocol. In these cases, estimates of the CI-OXPHOS oxygen consumption rates were made  
292 (see Fig. S1). The unstable traces were observed in five species (not in *D. melanogaster*) and found  
293 scattered across temperatures 34, 38 and 42°C. Traces that displayed stable rates during CI-  
294 OXPHOS at 34, 38 and 42°C in the five species were analysed to find the average time required for  
295 the oxygen consumption rate to stabilise, and the overall mean (138 ± 5 s) across temperatures and  
296 species were used to estimate the response to ADP in unstable traces (i.e. the oxygen consumption  
297 rate measured 133-143 s after the injection of ADP, see Fig. S1).

298 CI-LEAK and CI-OXPHOS were used to calculate the OXPHOS coupling efficiency ( $j_{\sim P}$ ) at  
299 the level of complex I:

300 
$$j_{\sim P} = 1 - \frac{\text{CI-LEAK}}{\text{CI-OXPHOS}} \quad \text{Eqn. 1}$$

301 A large increase in oxygen consumption following injection of ADP results in  $j_{\sim P}$  approaching 1,  
302 which indicates a highly coupled system as electrons transported by complex I are tightly coupled  
303 to oxidative phosphorylation, while an unaffected oxygen consumption rate ( $j_{\sim P} = 0$ ) indicates that  
304 oxidative phosphorylation does not exert flux control over the electrons transported from complex I  
305 (Gnaiger, 2014).

306 The substrate contribution ratio (SCR), i.e. the relative contribution to increased oxygen  
307 consumption rate when adding a new substrate (proline, then succinate followed by G3P) was  
308 calculated as

309 
$$\text{SCR} = \frac{\text{OCR}_2 - \text{OCR}_1}{\text{OCR}_1} \quad \text{Eqn. 2}$$

310 Where OCR<sub>1</sub> is the oxygen consumption rate prior to injection of the new substrate (e.g.  
311 CI+ProDH-OXPHOS) and OCR<sub>2</sub> is the oxygen consumption rate with the new substrate injected  
312 (e.g. CI+ProDH+CII-OXPHOS). A value of SCR close to 0 indicates that the added substrate did

313 not increase the oxygen consumption markedly, while SCR = 1 indicates a 100 % increase  
314 (doubling), SCR = 2 a 200 % increase (tripling), and so forth.

315 The maximal ETS capacity where electron transfer is not coupled to phosphorylation  
316 (FCCP-ETS) was compared to the maximal oxygen consumption rate coupled to phosphorylation  
317 (CI+ProDH+CII+mtG3PDH-OXPHOS) to calculate the non-coupled ratio,  $ETS_{max}/OXPHOS_{max}$ :

$$318 \quad ETS_{max}/OXPHOS_{max} = \frac{FCCP-ETS}{CI + ProDH + CII + mtG3PDH-OXPHOS} \quad \text{Eqn. 3}$$

319 If  $ETS_{max}/OXPHOS_{max} = 1$ , then the ETS is already fully coupled to phosphorylation, while  
320  $ETS_{max}/OXPHOS_{max} > 1$  indicates that the ETS is limited by the downstream process of  
321 phosphorylation, and thus have capacity to increase electron transport when the limiting step is  
322 alleviated by adding the uncoupler FCCP.

### 323 Enzymatic activities

324 Measurement of enzymatic activities for all species were performed at similar temperatures as the  
325 measurements of mitochondrial oxygen consumption (23.5, 30, 34, 38, 42 and 45°C; note the  
326 system could not be cooled to 19°C (substituted by 23.5°C) nor heated to 46°C (substituted by  
327 45°C)). For each species, 6 pools of female flies (4-7 days post-eclosion) were used (N = 6, 10 flies  
328 in each pool for all species except the large *D. immigrans* where only 5 flies were pooled), and all  
329 measurements were run with 2-3 technical replicates from each pool. Flies were chilled and their  
330 thoraces were dissected and stored at -80°C, until they were homogenized in phosphate-buffered  
331 saline (137 mM NaCl, 2.7 mM KCl, 10 mM Na<sub>2</sub>HPO<sub>4</sub>, 1.8 mM KH<sub>2</sub>PO<sub>4</sub>, pH 7.4) using a pellet  
332 pestle and the resulting homogenates were centrifuged at 750g for 5 min at 4°C. The supernatant  
333 was then directly used for measurements of NADH:ubiquinone oxidoreductase (complex I, CI) and  
334 pyruvate dehydrogenase (PDH). The remaining supernatant was kept at -80°C for later  
335 measurement of citrate synthase (CS) and total protein content. All enzymatic activities were  
336 measured following protocols already established (Ekström et al., 2017; Cormier et al., 2019) using  
337 a BioTek Synergy H1 microplate reader (BioTek®, Montreal, QC, Canada). Enzymatic activities  
338 (EA) were calculated using the following equation:

$$339 \quad EA = \frac{\Delta A \times V_f \times DF}{\epsilon \times V_{hom} \times h} \quad \text{Eqn. 4}$$

340 Where  $\Delta A$  represents the variation in absorbance,  $V_f$  is the final volume in the well, DF represents  
341 the dilution factor,  $\epsilon$  is the molar extinction coefficient,  $V_{hom}$  represents the volume of homogenate

342 used and  $h$  is the height of the volume in the well (including the bottom thickness). The height  $h$  is  
343 calculated as  $h = (4V)/(\pi d^2)$  where  $V$  is the final volume of the reaction (between 200-225  $\mu\text{L}$  of  
344 reaction medium depending on the enzyme measured) and  $d$  is the diameter of the well.

345 Concentrations for each compound of stock solutions used are described below:

346 CI (EC 7.1.1.2) activity was measured by following the reduction of 2,6-dichloroindophenol  
347 (DCPIP) at 600 nm ( $\epsilon=19.1 \text{ mL cm}^{-1} \mu\text{mol}^{-1}$ ). Briefly, CI oxidizes NADH and the electrons  
348 produced reduce the ubiquinone 1 (UQ1) which subsequently delivers the electrons to DCPIP. After  
349 incubation of homogenates in a 100 mM potassium phosphate buffer containing 0.5 mM EDTA, 3  
350  $\text{mg mL}^{-1}$  BSA, 1 mM  $\text{MgCl}_2$ , 2 mM KCN, 4.2  $\mu\text{M}$  antimycin A, 75  $\mu\text{M}$  DCPIP and 65  $\mu\text{M}$  UQ1,  
351 pH 7.5, for 5 minutes in the plate reader at assay temperature, 0.14 mM NADH was added to start  
352 the reaction, which was recorded for 10 min. The same reaction with 1  $\mu\text{M}$  rotenone was followed  
353 in parallel and the specific CI activity represented by the rotenone-sensitive activity was calculated.

354 PDH (EC 1.2.4.1) activity was measured using the reduction of p-iodonitrotetrazolium  
355 violet (INT) at 490 nm ( $\epsilon = 15.9 \text{ mL cm}^{-1} \mu\text{mol}^{-1}$ ) for 10 minutes after homogenates had been  
356 incubated in 50 mM tris-HCl, 0.1% (v/v) triton-X100, 1 mM  $\text{MgCl}_2$  and 1  $\text{mg mL}^{-1}$  BSA  
357 complemented with 2.5 mM NAD, 0.5 mM EDTA, 0.1 mM coenzyme A, 0.1 mM oxalate, 0.6 mM  
358 INT, 6  $\text{U mL}^{-1}$  lipoamide dehydrogenase, 0.2 mM thiamine pyrophosphate and initiated with 5 mM  
359 pyruvate, pH 7.8.

360 CS (EC 4.1.3.7) activity was determined at 412 nm for 5 minutes by measuring the  
361 reduction of 5,5-dithiobis-2-nitrobenzoic acid (DTNB,  $\epsilon=14.15 \text{ mL cm}^{-1} \mu\text{mol}^{-1}$ , Riddles et al.  
362 (1979)) using a 100 mM imidazole-HCl buffer. containing 0.1 mM DTNB, 0.1 mM acetyl-CoA and  
363 0.15 mM oxaloacetic acid, pH 8.0.

364 Total protein content was measured using the bicinchoninic acid method (Smith et al., 1985)  
365 and subsequently enzymatic activities are reported as  $\text{U g}^{-1}$  protein, where U represents 1  $\mu\text{mol}$  of  
366 substrate transformed to product in one minute.

### 367 Statistics

368 Statistical data analyses were performed in R version 3.6.2 (R Core Team, 2019).

369 For comparison of oxygen consumption rates, calculated ratios and enzyme activities statistical  
370 analyses were performed across temperatures within substrate combinations (or ratio type or

371 enzyme) within species using one-way ANOVAs and Tukey's *post hoc* test using the *emmeans*-  
372 function (estimated marginal means) in the *emmeans*-package in *R* (Lenth, 2019).

373 Oxygen consumption rates from stable and unstable traces (deemed after ADP injection)  
374 were compared using Welch two-sample *t*-tests (see Fig. S1 and accompanying text).

## 375 **Results**

### 376 High temperature results in loss of mitochondrial complex I oxidative capacity, but maximal 377 respiration is partially rescued by oxidation of alternative substrates

378 To examine the sensitivity of mitochondrial function to high temperature, mass-specific oxygen  
379 consumption rates (OCRs) were measured at six temperatures (19, 30, 34, 38, 42 and 46°C) in  
380 permeabilized thoraces from six *Drosophila* species over multiple steps of the electron transport  
381 system (ETS). For each step, OCRs were evaluated *between* assay temperatures *within* species with  
382 temperature as the fixed factorial variable using one-way ANOVAs and, when applicable, pairwise  
383 comparisons with Tukey adjustment of *p*-values (*F*-values: Table S1). To simplify the graphical  
384 presentation of the results, three species (*D. immigrans*, *D. mercatorum* and *D. virilis*) are shown in  
385 the Supplementary Information (Figs. S2, S3), and thus only measurements from *D. subobscura*, *D.*  
386 *melanogaster* and *D. mojavensis* are presented graphically below. The omitted species have  
387 organismal heat tolerances that approximately corresponds to that of the presented species in the  
388 order above (e.g. *D. immigrans* and *D. subobscura* have similar (low) heat tolerance).

389 LEAK-state respiration was assessed at the level of complex I (CI-LEAK) by injecting  
390 pyruvate and malate, and this corresponds to the oxygen consumption required to offset the proton  
391 leak across the inner mitochondrial membrane from the intermembrane space without  
392 phosphorylation. CI-LEAK was generally low in all species across temperatures. However, assay  
393 temperature was found to affect the rate in species *D. immigrans* (Fig. S2A), *D. subobscura* (Fig.  
394 2A), *D. mercatorum* (Fig. S2B) and *D. melanogaster* (Fig. 2B), though in the latter the *post hoc* test  
395 failed to separate the temperatures. No statistically significant effects of assay temperature were  
396 found in *D. virilis* (Fig. S2C) or *D. mojavensis* (Fig. 2C).

397 Next, complex I respiration was measured by injecting ADP to couple electron transport  
398 (and hence oxygen consumption) to phosphorylation (CI-OXPPOS). Assay temperature was found  
399 to affect CI-OXPPOS in all six species (one-way ANOVAs,  $p < 0.001$ ), and there was a general  
400 pattern of how this temperature effect was manifested. Increasing temperature from the acclimation

401 temperature (19°C) to 30°C increased CI-OXPPOS for all species (Figs. 2A-C, S2A-C), although  
402 for *D. immigrans* and *D. melanogaster* this increase was not statistically significant (Tukey's *post*  
403 *hoc* adjustment:  $p = 0.177$  and  $p = 0.281$ , respectively). In measurements performed at 34, 38 and  
404 42°C, we observed several unstable preparations with distinctive features; a sharp increase in OCR  
405 following ADP injection which was quickly followed by a gradual, consistent decrease that  
406 persisted until subsequent substrate injections which led to stabilisation of the OCR (see Fig. S1).  
407 The analysis and quantification of these unstable traces is discussed in the paragraph below. At  
408 34°C, stable CI-OXPPOS rates were similar to those measured at 30°C (*D. immigrans*, *D.*  
409 *melanogaster*, *D. virilis* and *D. mojavensis*), while it decreased in *D. subobscura* and *D.*  
410 *mercatorum*, albeit not significantly in the latter species. At 38°C, CI-OXPPOS decreased  
411 significantly compared to 34°C in the four least heat tolerant species, i.e. *D. immigrans*, *D.*  
412 *subobscura*, *D. mercatorum* and *D. melanogaster* (Figs. 2A,B, S2A,B). The heat tolerant *D. virilis*  
413 and *D. mojavensis* also showed a trend for decreased CI-OXPPOS at 38°C, but the rates were not  
414 significantly different from those measured at 34°C (Figs. 2C, S2C). At temperatures above 38°C,  
415 all species showed significantly decreased CI-OXPPOS, with non-significant differences between  
416 rates measured at 42 and 46°C, although the mean rates were almost always lower at 46°C.  
417 Accordingly, all species had CI-OXPPOS rates at the highest temperatures that were significantly  
418 lower than at their acclimation temperature (19°C).

419 As stated above, unstable CI-OXPPOS measurements were found in five of the six species  
420 (not *D. melanogaster*), and distributed such that *D. immigrans*, *D. subobscura* and *D. mercatorum*  
421 (heat sensitive) displayed instability at 34 and 38°C, while unstable CI-OXPPOS traces were found  
422 at 38 and 42°C in *D. virilis* and *D. mojavensis* (heat tolerant) (Table 1). To quantify this  
423 observation, we obtained the OCR following ADP injection at the time where “stable” traces would  
424 have stabilised CI-OXPPOS ( $138 \pm 5$  s) to generate a proxy for CI-OXPPOS in the unstable  
425 preparations. The mean of these “unstable” rates was generally higher than the mean of stable CI-  
426 OXPPOS at the same temperature within a species (compare shaded and full bars in Figs. 2, S2, see  
427 also Fig. S1) which could indicate that the unstable and declining traces were still underway in  
428 reaching a lower and potentially stable rate (see discussion).

429 Following measurements of CI-OXPPOS, cytochrome *c* was injected to test the condition of  
430 the outer mitochondrial membrane, and a reduced response (< 15% increase in OCR) was taken as  
431 an indication that the outer mitochondrial membrane was intact following permeabilization. Then



432 proline (CI+ProDH-OXPHOS) and succinate (CI+ProDH+CII-OXPHOS) were injected, and the  
433 general patterns for the thermal sensitivity of the resulting OCRs were similar to the patterns  
434 observed for CI-OXPHOS (similar lettering within species in Figs. 2A-C, S2A-C).

435 Injection of glycerol-3-phosphate (G3P) gave rise to the maximal OCR during the OXPHOS  
436 state, allowing to evaluate the convergent electron flow into the ETS in a coupled state. The OCRs  
437 measured as CI+ProDH+CII+mtG3PDH-OXPHOS may be driven by different contributions of  
438 mitochondrial complexes and dehydrogenases, and it is therefore of interest to examine the rates  
439 both as a measure of maximal coupled respiratory capacity, but also to indicate the relative  
440 contributions of each substrate. The latter part will be examined in the section on substrate switch  
441 below.

442 Maximal oxygen consumption rate in the coupled state (CI+ProDH+CII+mtG3PDH-  
443 OXPHOS) increased from 19°C to 30-38°C, with slight, non-significant decreases between 34 and  
444 38°C in all species except the heat-tolerant *D. virilis* and *D. mojavensis* (Figs. 2A-C, S2A-C). At  
445 42°C the maximal rates were mostly higher than those measured at 19°C (however only  
446 significantly in *D. mojavensis*, Fig. 2C), but lower than at 38°C (though only significantly in *D.*  
447 *virilis*). At the most extreme temperature, 46°C, OCRs in *D. immigrans*, *D. mercatorum* and *D.*  
448 *virilis* were lower compared to the other “high” temperatures (everything above 19°C), but similar  
449 to the rates measured at 19°C (Fig. S2A-C), while in *D. subobscura* and *D. melanogaster* the rates  
450 at 46°C were significantly lower than at all other temperatures (Fig. 2A,B). The most heat tolerant  
451 species, *D. mojavensis*, displayed a different response to the extreme temperature and maintained a  
452 high maximal OCR, which was similar to the other “high” temperatures (> 19°C) and significantly  
453 higher than the rate measured at 19°C (Fig. 2C). Hence, all species were able to maintain high  
454 maximal respiration rates at species-specific temperatures that are incompatible with survival for  
455 more than a few minutes.

456 After the maximal coupled respiration rate had been measured, FCCP was added to measure  
457 OCR in the non-coupled state, as this uncoupler allows protons to cross the inner mitochondrial  
458 membrane and thus alleviates any limitations to respiration by phosphorylation. The non-coupled  
459 respiration rates (FCCP-ETS) are presented in Figs. 2A-C and S2A-C, but another way to examine  
460 the potential constraints of the phosphorylating system on the ETS capacity is to calculate the non-  
461 coupled ratio ( $ETS_{max}/OXPHOS_{max}$ ) by dividing the non-coupled rate with the maximal coupled rate  
462 (FCCP-ETS/CI+ProDH+CII+mtG3PDH-OXPHOS, Table S2). In all six species, the highest values

463 of  $ETS_{max}/OXPHOS_{max}$  were observed at the lower range of temperatures indicating that ETS  
464 capacity was not fully coupled to phosphorylation here.  $ETS_{max}/OXPHOS_{max}$  decreased with  
465 temperature indicating that the full ETS capacity is utilized for phosphorylation at high  
466 temperatures ( $ETS_{max}/OXPHOS_{max}$  was even frequently below 1 which is the lowest theoretical  
467 value of  $ETS_{max}/OXPHOS_{max}$  since it indicates that the OCR remained the same following FCCP  
468 injection).

469 Maximal activity of complex IV (CIV), the last respiratory enzyme of the ETS where  
470 oxygen is used as the final electron acceptor, was measured after inhibition of complexes I, II and  
471 III and was stimulated by the artificial substrate TMPD (along with ascorbate) (Fig. S4). When  
472 temperature was increased from 19 to 30°C, all species showed increased CIV activity, which for *D.*  
473 *subobscura*, *D. mercatorum*, *D. virilis* and *D. mojavensis* were significantly higher ( $p \leq 0.003$ , one-  
474 way ANOVA with Tukey's *post hoc* adjustment), but did not reach the level of significance in *D.*  
475 *immigrans* and *D. melanogaster* ( $p = 0.121$  and  $0.696$ , respectively). At 34°C CIV activity was  
476 mostly similar or not significantly increased compared to 30°C ( $p \geq 0.081$ ), and likewise when CIV  
477 activity measured at 38°C was compared to 34°C. However, *D. immigrans* showed a significant  
478 increase in CIV activity ( $p = 0.003$ ), and also reached its maximal capacity at this temperature  
479 (38°C). *D. mercatorum* and *D. melanogaster* also peaked in measured CIV capacity at 38°C, while  
480 *D. subobscura* and *D. virilis* showed a plateau-like CIV capacity from 30 to 38°C, with slightly  
481 higher capacities at the lower temperatures. The most heat tolerant species, *D. mojavensis*, peaked  
482 at 42°C. This was however not statistically different from the activity observed at 38°C ( $p = 0.993$ ).  
483 For the other species, 42°C decreased CIV capacity, although only significantly in *D. immigrans*  
484 and *D. mercatorum* ( $p < 0.001$  and  $p = 0.007$ , respectively). At the extreme 46°C, all species  
485 showed significantly reduced rates compared to the other "high temperatures", while the CIV  
486 activity was mostly similar to the rate measured at 19°C (only *D. subobscura* showed a significantly  
487 lower rate than at 19°C).

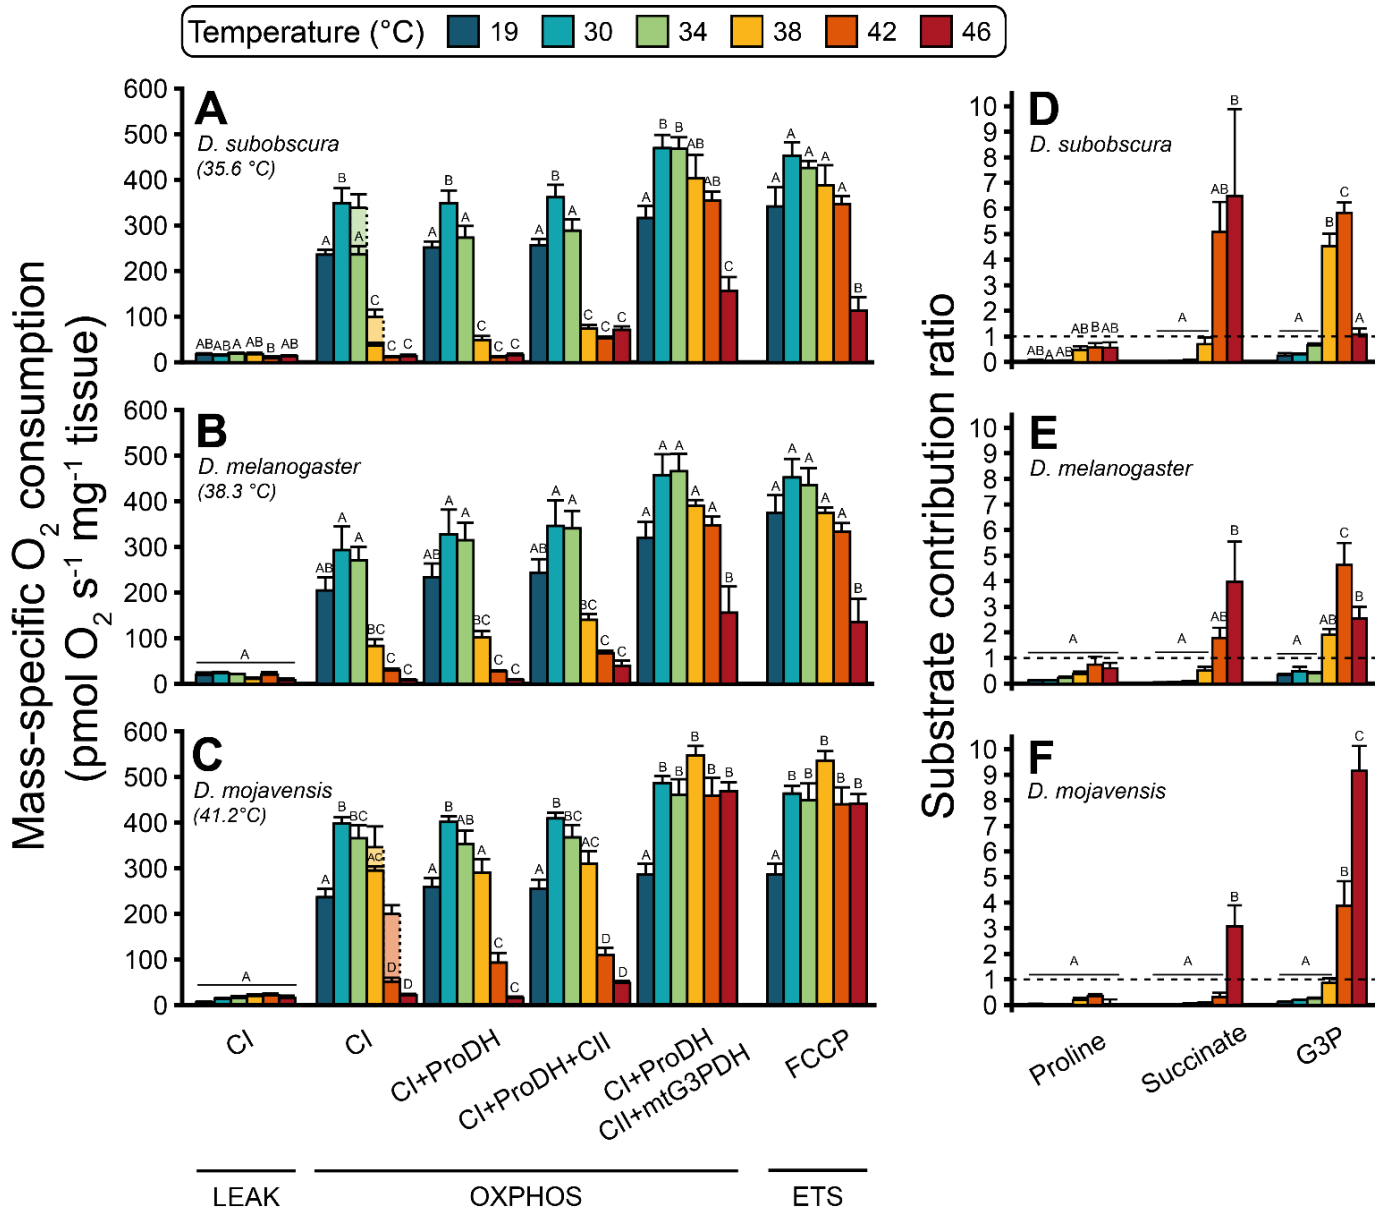

488

489 Fig. 2 Mass-specific oxygen consumption rates (OCRs) in permeabilized *Drosophila thoraces* and  
 490 calculated substrate contribution ratios for three of the tested species. (A-C) Using a substrate-  
 491 uncoupler-inhibitor titration (SUIT) protocol (Fig. 1), OCRs were measured in the LEAK (without  
 492 ADP), OXPPOS (oxidative phosphorylation, respiration coupled to phosphorylation with  
 493 saturating ADP) and ETS (electron transport system, non-coupled from phosphorylation) states.  
 494 Briefly, complex I substrates pyruvate and malate were provided (CI-LEAK), ADP was added to  
 495 couple respiration to phosphorylation (CI-OXPPOS), and the OXPPOS state was further measured  
 496 using successive injections of substrates stimulating different parts of the ETS: proline  
 497 (CI+ProDH-OXPPOS), succinate (CI+ProDH+CII-OXPPOS) and glycerol-3-phosphate  
 498 (CI+ProDH+CII+mtG3PDH-OXPPOS). Maximal capacity of the ETS with convergent electron

499 *transfer from the pathways above, was measured using the artificial uncoupler FCCP (FCCP-ETS).*  
500 *The SUIT protocol was performed at six assay temperatures, 19°C (maintenance temperature, dark*  
501 *blue) and 30, 34, 38, 42 and 46°C (temperature increasing going towards the rightmost bars in the*  
502 *clusters) covering benign and stressfully high temperatures for the Drosophila species tested*  
503 *(ordered A through C indicating increasing organismal heat tolerance, with temperature estimated*  
504 *to cause knockdown after one hour in parentheses (Jørgensen et al., 2019)). OCRs are reported as*  
505 *mean pmol O<sub>2</sub> s<sup>-1</sup> mg<sup>-1</sup> tissue ± s.e.m., sample size for each species × temperature combination is*  
506 *described in Table 1. In some preparations, oxygen flux did not stabilise following the injection of*  
507 *ADP (CI-OXPHOS) and instead an estimate of the flux was made (lighter shaded, dashed lined*  
508 *bars, see main text and Fig. S1). Within each step of the protocol (cluster of bars), the OCRs were*  
509 *compared between temperatures within species using a one-way ANOVA with a Tukey's post hoc*  
510 *test, and dissimilar letters within a cluster indicate statistically significant differences (p < 0.05).*  
511 *(D-F) Substrate contribution ratio (SCR) for the three sequentially injected substrates; proline,*  
512 *succinate and glycerol-3-phosphate (G3P). SCR is calculated as the ratio between the increase in*  
513 *OCR following injection of the new substrate compared to the prior OCR, and as such the SCR of*  
514 *proline is based on the change compared to CI-OXPHOS, SCR of succinate on CI+ProDH-*  
515 *OXPHOS and SCR of G3P on CI+ProDH+CII-OXPHOS, respectively. The scale of the SCRs*  
516 *refers to fold changes from the base rate, i.e. 0 means that the added substrate did not change the*  
517 *OCR, 1 refers to a doubling (100% increase from base rate), 2 to three-fold change (200%), etc.*  
518 *SCRs are reported as mean ± s.e.m., sample size for each species × temperature combination is*  
519 *described in Table 1. For preparations that were unstable at CI-OXPHOS it was not possible to*  
520 *calculate the SCR for proline, and accordingly values of SCR for proline are based solely on stable*  
521 *CI-OXPHOS preparations, while SCR for succinate and G3P were calculated for all preparations.*  
522 *Within each species, SCRs were compared between temperatures using a one-way ANOVA with a*  
523 *Tukey's post hoc test, and dissimilar letters within a cluster indicate significant differences (p <*  
524 *0.05). In D. melanogaster a significant effect of temperature was found for proline (F<sub>5,37</sub> = 2.571, p*  
525 *= 0.043), but the post hoc test failed to reveal significant contrasts between temperatures. The*  
526 *results from the other three species are presented in Fig. S2.*

527 High temperature diminishes mitochondrial coupling at the level of complex I

528 The OXPHOS coupling efficiency ( $j_{\approx p}$ , unitless) at the level of complex I was calculated as [1-(CI-  
529 LEAK/CI-OXPHOS)], a linearized form of the traditional respiratory control ratio (RCR) which  
530 describes the flux control of ADP on CI-supported respiration (Table 1). Here  $j_{\approx p}$  approaching 1  
531 indicates a maximally coupled complex I and  $j_{\approx p} = 0$  indicates a non-ADP controlled complex I  
532 respiration. All species showed high values of  $j_{\approx p}$  at 19, 30 and 34°C (range: 0.892 – 0.972, which is  
533 above the 0.8 value that is traditionally expected from “healthy”, functional mitochondria (RCR of  
534 5 transformed to  $j_{\approx p}$ ) (Gnaiger, 2014)) and within species these values were not significantly  
535 different ( $p \geq 0.949$ , one-way ANOVA with Tukey’s *post hoc* adjustment). At 38°C *D. subobscura*  
536 displayed a reduced  $j_{\approx p}$  ( $0.384 \pm 0.104$ ) compared to the lower temperatures ( $p < 0.003$ ), and similar  
537 reductions were found at 42°C for *D. immigrans* ( $0.195 \pm 0.069$ ,  $p < 0.001$ ), *D. mercatorum* ( $0.381$   
538  $\pm 0.072$ ,  $p < 0.001$ ), *D. melanogaster* ( $0.252 \pm 0.123$ ,  $p < 0.001$ ) and *D. virilis* ( $0.431 \pm 0.136$ ,  $p <$   
539  $0.006$ ). For *D. mojavensis*  $j_{\approx p}$  at 42°C was reduced compared to 19 – 34°C ( $0.377 \pm 0.201$ ,  $p$   
540  $< 0.009$ ), but the value was not significantly different from 38°C ( $p = 0.058$ ). However, at the most  
541 extreme temperature, 46°C, all species displayed highly reduced values of  $j_{\approx p}$  compared to the lower  
542 temperatures (Table 1).

543 Temperature-dependent shift in mitochondrial substrate oxidation

544 Using the sequential injection of substrates in the SUIP protocol allowed us to calculate the relative  
545 contribution to the OCR for each substrate (the substrate contribution ratio - SCR, Figs. 2D-F, S2D-  
546 F). At the lower temperatures (19-34°C), it is clear from the SCRs of all species that addition of the  
547 three substrates proline, succinate and glycerol-3-phosphate (G3P) did not stimulate the OCR  
548 markedly above that measured with only pyruvate and malate. This is in marked contrast to the  
549 situation at higher temperatures where SCRs were elevated for proline and succinate particularly at  
550 42 and 46°C, and SCRs for G3P were very high at 38-46°C. Across species the relative effect of  
551 adding proline was smaller than the effect of adding succinate or G3P. Only in *D. subobscura* and  
552 *D. mercatorum* was it possible to detect a temperature effect on the stimulation from proline  
553 injection and discern between temperatures (with larger responses at higher temperatures) (Figs.  
554 2D, S2E). Succinate gave high values of SCR in *D. immigrans*, *D. subobscura* and intermediate  
555 values in *D. melanogaster* at both 42 and 46°C, while large effects of succinate were only found at  
556 46°C in *D. mercatorum*, *D. virilis* and *D. mojavensis*. For G3P, *D. immigrans* (Fig. S2D) and *D.*

557 *subobscura* (Fig. 2D) showed significant increases in SCR at 38°C, while this effect was only  
558 significant at 42°C for the remaining four species (Figs. 2B,C and S2B,C). At 46°C, SCR for G3P  
559 decreased in most species except *D. virilis* and *D. mojavensis*, in which the SCR increased (though  
560 only significantly in *D. mojavensis* (Fig. 2C)).

561         The high SCR values indicate that the OCR is markedly stimulated by the injection of these  
562 substrates. In other words, we find that when complex I fails (see above), other substrates can take  
563 over to support respiration. An additional set of experiments were performed to examine if the  
564 increased effect of injection of alternative substrates (proline, succinate and G3P) at high  
565 temperatures was attributable to the removal of a complex I “masking effect” through the  
566 temperature-induced breakdown of CI-OXPHOS, or rather that the utilisation processes of  
567 alternative substrates were temperature-dependent. Specifically, a second SUIIT protocol was  
568 designed to investigate if proline and G3P could facilitate high OCRs at 34 °C, a temperature where  
569 CI-OXPHOS is high (using the standard SUIIT protocol, Fig. 2A-C), when their effect on OCR is  
570 marginal using the standard protocol at this temperature. The OCRs measured with the two SUIIT  
571 protocols are not directly comparable, but when we tested *D. subobscura*, *D. melanogaster* and *D.*  
572 *mojavensis*, we found that proline and particularly G3P can sustain high OCRs at 34°C, when  
573 complex I is artificially inhibited with rotenone prior to substrate injections (Fig. S5). We also  
574 inhibited complex I at 42°C, a temperature where complex I is already markedly depressed when  
575 measured using the standard protocol (Fig. 2A-C) and saw a similar large contribution of  
576 particularly G3P to oxygen consumption (Fig. S5).

577 *Table 1: OXPHOS coupling efficiency ( $j_{\approx p}$ ) for each species at each temperature reported as mean*  
 578  *$\pm$  s.e.m. Values of  $j_{\approx p}$  closer to 1 indicate well-coupled mitochondria while values close to 0 indicate*  
 579 *poorly coupled mitochondria, at least at complex I level. As it was not possible to measure the*  
 580 *parameters required for calculation of  $j_{\approx p}$  in unstable preparations, the mean and s.e.m. are based*  
 581 *solely on stable preparations (the first number in the parentheses, the second refers to the total*  
 582 *number of preparations measured for each species  $\times$  temperature combination). Within a species,*  
 583 *dissimilar letters indicate statistically significant differences in the OXPHOS coupling efficiency*  
 584 *between temperatures (one-way ANOVA with Tukey's post hoc test,  $p < 0.05$ ). Values of s.e.m.  $<$*   
 585 *0.005 are reported as 0.00 to reduce decimal places. Oxygen coupling efficiencies in bold represent*  
 586 *the drop below the "healthy" value 0.8 (linearized transformation of respiratory control ratio RCR*  
 587 *of 5, Gnaiger (2014)).*

| Temperature (°C) | <i>D. immigrans</i>                             | <i>D. subobscura</i>                             | <i>D. mercatorum</i>                            | <i>D. melanogaster</i>                          | <i>D. virilis</i>                               | <i>D. mojavensis</i>                             |
|------------------|-------------------------------------------------|--------------------------------------------------|-------------------------------------------------|-------------------------------------------------|-------------------------------------------------|--------------------------------------------------|
| 19               | 0.92 $\pm$ 0.01<br>(8/8)<br>A                   | 0.93 $\pm$ 0.01<br>(7/7)<br>A                    | 0.98 $\pm$ 0.00<br>(8/8)<br>A                   | 0.90 $\pm$ 0.02<br>(7/7)<br>A                   | 0.95 $\pm$ 0.01<br>(7/7)<br>A                   | 0.97 $\pm$ 0.01<br>(7/7)<br>A                    |
| 30               | 0.95 $\pm$ 0.01<br>(7/7)<br>A                   | 0.96 $\pm$ 0.001<br>(7/7)<br>A                   | 0.97 $\pm$ 0.00<br>(7/7)<br>A                   | 0.89 $\pm$ 0.03<br>(8/8)<br>A                   | 0.96 $\pm$ 0.01<br>(7/7)<br>A                   | 0.97 $\pm$ 0.01<br>(7/7)<br>A                    |
| 34               | 0.94 $\pm$ 0.01<br>(7/10)<br>A                  | 0.95 $\pm$ 0.01<br>(2/8)<br>A                    | 0.92 $\pm$ 0.01<br>(5/8)<br>A                   | 0.92 $\pm$ 0.01<br>(7/7)<br>A                   | 0.97 $\pm$ 0.01<br>(7/7)<br>A                   | 0.96 $\pm$ 0.01<br>(7/7)<br>A                    |
| 38               | <b>0.78 <math>\pm</math> 0.04</b><br>(5/9)<br>A | <b>0.38 <math>\pm</math> 0.10</b><br>(3/8)<br>B  | 0.98 $\pm$ NA<br>(1/7)<br>A                     | 0.87 $\pm$ 0.03<br>(7/7)<br>A                   | 0.94 $\pm$ 0.01<br>(3/7)<br>A                   | 0.90 $\pm$ 0.00<br>(3/8)<br>AB                   |
| 42               | <b>0.20 <math>\pm</math> 0.07</b><br>(7/7)<br>B | <b>0.27 <math>\pm</math> 0.07</b><br>(8/8)<br>BC | <b>0.38 <math>\pm</math> 0.07</b><br>(7/7)<br>B | <b>0.25 <math>\pm</math> 0.12</b><br>(8/8)<br>B | <b>0.43 <math>\pm</math> 0.14</b><br>(6/7)<br>B | <b>0.38 <math>\pm</math> 0.20</b><br>(2/7)<br>BC |
| 46               | <b>0.01 <math>\pm</math> 0.18</b><br>(7/7)<br>B | <b>0.04 <math>\pm</math> 0.07</b><br>(6/6)<br>C  | <b>0.23 <math>\pm</math> 0.07</b><br>(7/7)<br>B | <b>0.06 <math>\pm</math> 0.20</b><br>(6/6)<br>B | <b>0.27 <math>\pm</math> 0.10</b><br>(7/7)<br>B | <b>0.32 <math>\pm</math> 0.15</b><br>(6/6)<br>C  |

588 *Note for Table 1: For *D. mercatorum* at 38 °C s.e.m. could not be calculated (NA), as it was only*  
 589 *possible to calculate  $j_{\approx p}$  for a single preparation.*

590 Breakdown of complex I mediated respiration is not related to a loss of complex I enzyme activity

591 To examine whether the breakdown of CI-OXPHOS observed at the higher assay temperatures was  
592 related to temperature-induced disruption of enzymatic function in the electron transporting enzyme  
593 itself, enzymatic catalytic capacities were measured at a range of temperatures (23.5-45°C).  
594 Complex I showed stable increases in enzymatic catalytic capacity with temperature in all species  
595 (Figs. 3A, S3A), with no apparent breakdown in contrast to the high-resolution respirometry  
596 experiments. Next, we measured pyruvate dehydrogenase (PDH) which oxidizes pyruvate into  
597 acetyl-CoA and thus links glycolysis with the tricarboxylic acid cycle while producing NADH that  
598 will feed electrons to complex I (Fig. 1). For all species the enzymatic activity of PDH increased  
599 with temperature, until conversion rates dropped in species with low to moderate heat tolerance at  
600 42-45°C (*D. immigrans*, *D. subobscura*, *D. melanogaster* and *D. mercatorum*), although not  
601 significantly in the latter species (Figs. 3B, S3B). In the heat tolerant species (*D. virilis* and *D.*  
602 *mojavensis*) PDH activity increased or remained the same (as at 42°C) at 45°C. PDH thus showed  
603 species-specific responses to increased temperature that may relate to species heat tolerance.  
604 Finally, we measured the activity of citrate synthase (CS) which facilitates the condensation of  
605 acetyl-CoA with oxaloacetate to form citrate in the tricarboxylic acid cycle (Fig. 1). CS showed  
606 similar reactions to high temperature in all species (Figs. 3C, S3C), with activity increasing from  
607 23.5 to 30°C. Conversion rates levelled at 34°C (with small increases in *D. immigrans* and *D.*  
608 *melanogaster*), then dropped significantly at 38°C (*D. immigrans*, *D. mercatorum* and *D.*  
609 *mojavensis*) and 42°C in *D. subobscura*, *D. melanogaster* and *D. virilis*. Accordingly, citrate  
610 synthase displayed heat-induced perturbation of enzymatic catalytic capacity in all six species,  
611 however the pattern was not following species heat tolerance to the same degree as observed for  
612 PDH activity.



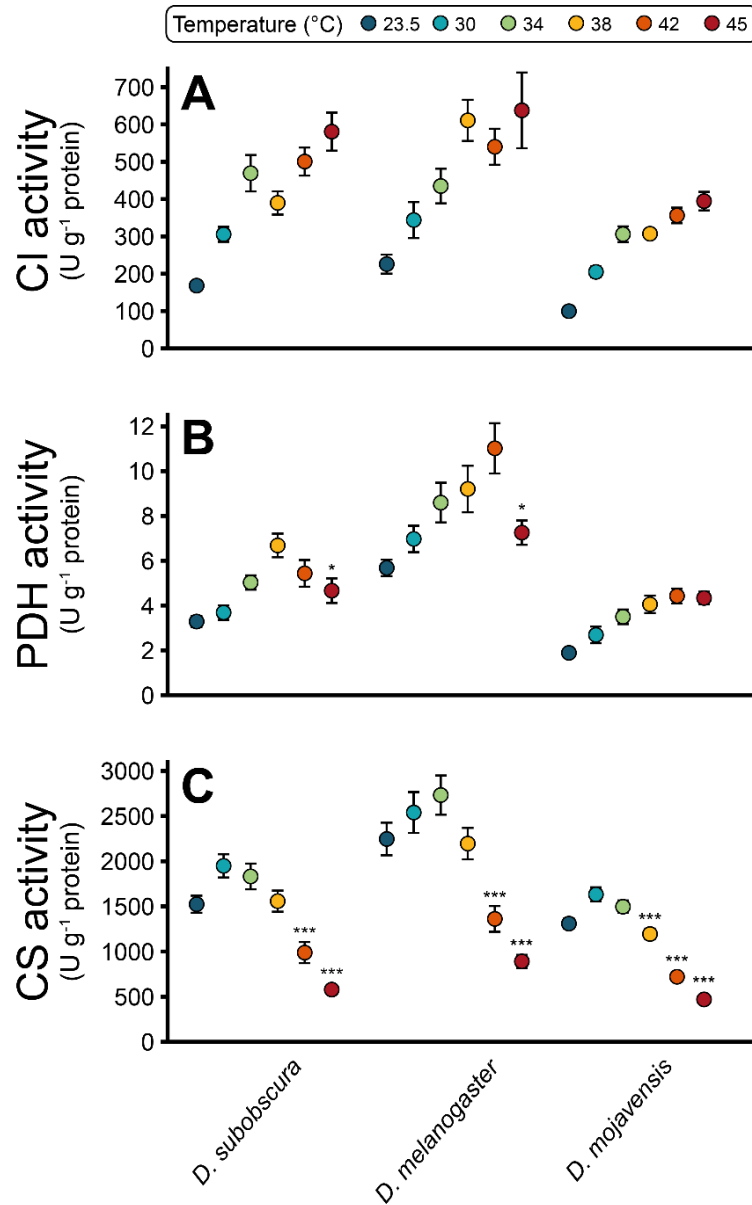

613

614 Fig. 3 Mitochondrial enzymes display divergent responses to high temperature. Enzymatic activities  
615 were measured in homogenized thoraces for A) NADH:ubiquinone oxidoreductase (complex I, CI),  
616 B) pyruvate dehydrogenase (PDH) and C) citrate synthase (CS), here shown for three species (see  
617 Fig. S3 for the other species). All enzymatic activities are reported as U g<sup>-1</sup> protein mean ± s.e.m.,  
618 where U represents 1 μmol substrate transformed to product in 1 minute. Notice that the  
619 temperatures used for measurements are not the same as used for high-resolution respirometry  
620 (23.5 and 45°C substituted 19 and 46°C, respectively, see Materials and methods). Asterisks denote  
621 statistically significant differences between the measurements at higher temperatures than the  
622 temperature where the maximal enzymatic catalytic capacity was observed and the maximal rate;  
623 \*p < 0.05, \*\*p < 0.01 and \*\*\*p < 0.001 in one-way ANOVAs with Tukey post hoc adjustments.

624 **Discussion**

625 In the present study we measured mitochondrial respiration rates in six *Drosophila* species with  
626 differing heat tolerance at temperatures ranging from benign to temperatures around and above  
627 species tolerance limits. With this design we examined how temperature affects mitochondrial  
628 function, and if loss of mitochondrial function can be related to organismal heat tolerance.

629 Mitochondrial function persists at temperatures above species heat tolerance

630 Several studies on ectotherms suggest that mitochondria are more heat tolerant than the animal as a  
631 whole (Chung and Schulte, 2020), and in insects a mitochondrial ‘hyperthermic overdrive’ in which  
632 mitochondria perform rapid aerobic metabolism is observed after the loss of higher organismal  
633 function (Heinrich et al., 2017; Mölich et al., 2013). In accordance, a recent study on the honey bee  
634 *Apis mellifera* found that mitochondrial respiration was intact at 50°C (Syromyatnikov et al., 2019),  
635 which is higher or equal to the CT<sub>max</sub> measured in two subspecies of *A. mellifera* using thermolimit  
636 respirometry (Kovac et al., 2014). In the *Drosophila* system we find similar evidence for sustained  
637 mitochondrial function at high temperatures since all species were able to maintain high oxygen  
638 consumption rates at temperatures above their organismal heat limit (as characterized in Jørgensen  
639 et al. (2019)). However, our results show that this mitochondrial heat tolerance is highly dependent  
640 on the oxidative substrates used to fuel respiration.

641 Hyperthermic breakdown of complex I-supported respiration

642 Energetic demand increases with temperature in ectotherms, and accordingly the oxygen  
643 consumption related to mitochondrial aerobic ATP production must follow. When temperature was  
644 increased from the acclimation temperature (19°C) to 30°C, a high yet benign temperature change  
645 for all of the tested species, we observed a general increase in maximal oxygen consumption rate  
646 under OXPHOS conditions (CI+ProDH+CII+mtG3PDH-OXPHOS), which was primarily driven by  
647 increased complex I-supported oxygen consumption (Figs. 2A-C and S2A-C). The OCRs measured  
648 in *D. melanogaster* for each step of the SUIT protocol at 19 and 30°C were similar to previous  
649 measurements using the same protocol at 24°C in that species (Cormier et al., 2019). At 34°C,  
650 however, maximal oxygen consumption stagnated, and in the three least heat tolerant species (*D.*  
651 *immigrans*, *D. subobscura* and *D. mercatorum*), the OCR did not stabilize in some preparations  
652 following ADP injection (CI-OXPHOS, Figs. 2, S1,2), which was also observed at 38°C in the  
653 same species. Likewise, at 38°C some of the preparations from the heat tolerant species *D. virilis*

654 and *D. mojavensis* displayed this ineptness to maintain a stable CI-OXPHOS, and for these tolerant  
655 species the phenomenon persisted at 42°C (Figs. 2, S1,2). It was only in *D. melanogaster*, a  
656 moderately heat tolerant species for which this SUIT protocol was optimized, that we did not  
657 observe this. Instead this species was characterised by an abrupt decrease in CI-OXPHOS when  
658 temperature was increased from 34 to 38°C (Fig. 2B) which was also observed in the stable CI-  
659 OXPHOS traces in the other species (at 34-38°C or 38-42°C depending on species). These findings  
660 indicate a hyperthermic breakdown of complex I-supported respiration. Indeed, it has been shown  
661 that NADH-dependent (i.e. CI-supported) OCRs measured in *in vivo* heat-treated blowflies was  
662 reduced by 50 % compared to non-heated controls (El-Wadawi and Bowler, 1996). Complex I has  
663 also been suggested to be a primary site of heat failure in liver mitochondria from marine fishes  
664 (Chung et al., 2018; Martinez et al., 2016), in marine crustaceans (Iftikar et al., 2010), as well as in  
665 maize (Pobezhimova et al., 1996). In the present study the OXPHOS coupling efficiency  $j_{\approx P}$  (the  
666 linearized form of the respiratory control ratio, RCR) at the level of complex I, decreased with  
667 higher temperature (Table 1), which is an obvious consequence of the hyperthermic decrease in CI-  
668 OXPHOS rather than an increase in CI-LEAK, as previously observed (Hilton et al., 2010; Iftikar et  
669 al., 2010; Iftikar et al., 2014; Lemieux et al., 2010b). Accordingly, indications of a hyperthermic  
670 breakdown of complex I calls for examination of the underlying cause(s) as well as how the  
671 mitochondria function with this impairment considering the persistent ability to maintain high  
672 maximal OCRs across a wide range of high temperatures.

673         Complex I, or NADH:ubiquinone oxidoreductase, is the major entry point for electrons into  
674 the ETS situated in the inner mitochondrial membrane (Fig. 1) via oxidation of mitochondrial  
675 NADH produced by various metabolic pathways such as the TCA cycle, pyruvate oxidation and  $\beta$ -  
676 oxidation of fatty acids (Hirst, 2010). As the mitochondrial membranes are impermeable to NADH  
677 and  $\text{NAD}^+$ , complex I is also an important regulator of the matrix redox pool ( $\text{NAD}^+/\text{NADH}$  ratio)  
678 which is required for the TCA cycle and various enzyme functions to continue (Sacktor, 1975).  
679 Since CI-OXPHOS decreased at high temperatures in all of the species tested, we measured the  
680 enzymatic activity of complex I to examine if this decline in activity was due to impaired enzyme  
681 function. We found that, at least in homogenised thoraces, complex I activity did not suffer from a  
682 hyperthermic breakdown. Instead, enzymatic catalytic capacities increased with temperature, and  
683 peaked at 45°C (the highest temperature tested) (Figs. 3A, S3A). Thus, it is likely that the limitation  
684 of CI-OXPHOS observed here at high temperature occurs upstream of complex I. A previous study  
685 in tobacco hornworm (*Manduca sexta*) reported that the substrate oxidation system governs a

686 significant portion of the temperature effect on maximal mitochondrial respiration (Chamberlin,  
687 2004). The pyruvate dehydrogenase complex (PDH) is a potential candidate explaining the  
688 observed decrease in CI-OXPPOS (Blier et al., 2014; Lemieux et al., 2010a) (Fig. 1). PDH activity  
689 increased with temperature (as would be expected), but above 38°C, there were species-specific  
690 differences in the reaction patterns (Figs. 3B, S3B). In the least heat tolerant species (*D. immigrans*  
691 and *D. subobscura*) activity decreased at 42 and 45°C, while in the moderately heat tolerant species  
692 (*D. mercatorum* and *D. melanogaster*) it increased up to 42°C and then decreased at 45°C. Finally,  
693 in the most heat tolerant species, *D. virilis* and *D. mojavensis*, PDH activity increased continuously  
694 or stagnated at 45°C. These interspecific patterns could be related to species heat tolerance, as  
695 observed for other enzymes (Dahlhoff and Somero, 1993; Hochachka and Somero, 2002). However,  
696 the temperatures at which declines in PDH activity are observed are higher than the temperature  
697 interval (34-42°C) where CI-OXPPOS rates were found to decrease, and notably for *D. virilis* and  
698 *D. mojavensis* in which PDH activities do not appear to be compromised at all. Lastly, we also  
699 measured the activity of citrate synthase (CS, Fig. 1). Generally CS activities increased from 19 to  
700 30°C but decreased slightly in most species at 34°C before they progressively dropped as  
701 temperature was raised to 45°C (Figs. 3C, S3C). Unlike for PDH activity, there was no clear pattern  
702 for the decrease in enzymatic activity between species that could potentially be related to their heat  
703 tolerance. Instead, it seems that CS is generally challenged at high temperatures in *Drosophila*.  
704 Heart CS (and PDH) activity was found to decrease at temperatures around and exceeding  $CT_{max}$  in  
705 European perch (*Perca fluviatilis*), which was interpreted as an impaired capacity to oxidize  
706 pyruvate which could ultimately limit the entry of electrons into the ETS (Ekström et al., 2017).  
707 However, the literature is ambiguous on the potential limitation of CS (and PDH) on ectotherm  
708 metabolism at high temperatures and it has been disputed in mussels (Hraoui et al., 2020).  
709 Nevertheless, it must be noted that the enzymatic activities measured *in vitro* here represent the  
710 maximal catalytic capacity and that they may not directly reflect metabolic flux *in vivo*. Thus, the  
711 temperature mismatch between enzymatic activities and CI-OXPPOS breakdown could suggest  
712 involvement of other components of the substrate oxidation system, e.g. the mitochondrial pyruvate  
713 carrier. Although the decreased catalytic capacities of CS and PDH activities may create a  
714 bottleneck for NADH production by the TCA cycle, this cannot fully explain the drastic drop in CI-  
715 OXPPOS observed at high temperatures. A possible explanation would be that allosteric regulation  
716 and/or covalent modifications occur at the level of complex I at high temperature, reducing its  
717 ability to oxidize NADH. The present study shows that complex I-supported oxygen consumption is

718 challenged at high temperatures across the tested *Drosophila* system, with abrupt declines in CI-  
719 OXPHOS at temperatures that tend to relate to the species heat tolerance, but also that this decline  
720 is not likely to be an effect of heat perturbations on the complex I enzyme itself. Instead the  
721 enzymes PDH and CS which are working downstream of the ETS showed decreased activities at  
722 high temperatures and may thus point to a cause of the observed decrease in CI-OXPHOS; that the  
723 substrate oxidation system fails to provide the appropriate amount of NADH to complex I.

#### 724 Mitochondrial flexibility: oxidation of alternative substrates sustains high maximal oxygen 725 consumption rates

726 Insect species have different preferred substrate for flight metabolism; short-term fliers like flies  
727 and bees (*Diptera* and *Hymenoptera*) mainly use carbohydrates while locusts and butterflies  
728 (*Orthoptera* and *Lepidoptera*) use fats as fuel for sustained flight (Chadwick and Gilmour, 1940;  
729 Krogh and Weis-Fogh, 1951; Sacktor, 1955). A survey of the literature on insect mitochondrial  
730 respiration presented by Soares et al (2015) indicated that *Drosophila* are particularly relying on  
731 NADH-dependent (i.e. electron donors for complex I) respiration, which includes pyruvate, malate  
732 and proline. Notice that proline is included as an electron donor for complex I as it can be  
733 transformed into  $\alpha$ -ketoglutarate and thus increase TCA cycle intermediates to oxidize pyruvate  
734 (anaplerotic role, Fig. 1) (Sacktor and Childress, 1967). However, proline is also recognized as a  
735 direct electron donor to the ubiquinone pool through the flavoenzyme proline dehydrogenase  
736 (Bursell, 1981; McDonald et al., 2018; Olembo and Pearson, 1982; Soares et al., 2015; Teulier et  
737 al., 2016), and some insects are even relying on proline as their main fuel (Bursell, 1963; Teulier et  
738 al., 2016). G3P is also an important oxidative substrate for insects allowing the entry of electrons  
739 into the ETS via the mtG3PDH, as it is at the intersection of glycolysis, fatty acid degradation and  
740 oxidative phosphorylation (McDonald et al., 2018). In insect flight muscle, this reaction is the most  
741 important redox cycler (glycerol phosphate shuttle) for maintaining redox balance ( $\text{NAD}^+/\text{NADH}$ )  
742 in the cytosol (Sacktor, 1975), attested by *Drosophila* mutants with reduced or absent mtG3PDH  
743 displaying debilitated flight ability (Carmon and MacIntyre, 2010; Carmon et al., 2010). However,  
744 almost nothing is known about the regulatory mechanisms at the three mitochondrial loci of  
745 metabolic control in insects during temperature changes; namely, the oxidation of pyruvate, proline  
746 and G3P.

747 The oxygen consumption rates measured in the present study on *Drosophila* at benign  
748 temperatures also indicated that pyruvate (as NADH-dependent or CI-OXPHOS) was the most

749 efficient fuel for the ETS, congruent with the data compiled by Soares et al (2015). Once  
750 temperature increased and the breakdown in CI-OXPHOS was observed, the substrate contribution  
751 ratio (SCR) of the other provided substrates (proline, succinate and glycerol-3-phosphate (G3P))  
752 increased (Figs. 2, S2), but this is not surprising as the calculation of SCR is based on the OCR  
753 achieved by the previous substrate. Hence, we investigated if the “newfound” use of alternative  
754 substrates with increasing temperature was solely due to the loss of CI-OXPHOS (here labelled the  
755 *masking effect*), or if the pathways for the alternative substrates were increasingly active due to the  
756 higher temperatures. To examine this, we conducted a second set of measurements on  
757 permeabilized thoraces with a new SUI protocol, inhibiting complex I with rotenone prior to  
758 injection of alternative substrates (proline and G3P) at 34°C (when CI-OXPHOS is not usually  
759 compromised) and 42°C (when CI-OXPHOS is “naturally” reduced). We found that proline and  
760 particularly G3P efficiently maintained high rates of oxygen consumption (Fig. S5). Together with  
761 the increased values of SCR for proline and G3P at high temperatures, this indicates that a *masking*  
762 *effect* from complex I dominates the apparent contribution of alternative substrates to the OCR,  
763 rather than a clear temperature effect on alternative pathways.

764 To summarise, when CI-OXPHOS is challenged by high temperatures, other substrates can  
765 be oxidized instead to deliver electrons to the ETS. This switch in substrate maintains a high  
766 maximal oxygen consumption rate even at temperatures above those normally considered lethal. In  
767 model simulations of mitochondrial flexibility in human cardiomyocyte mitochondria with complex  
768 I deficiency, Zieliński et al. (2016) identified two dominant mechanisms to maintain redox balance.  
769 These reactions were the glycerol phosphate shuttle (cytosolic) and the cycle between proline  
770 dehydrogenase and pyrroline-5-carboxylate reductase (mitochondrial). In accordance, it has been  
771 shown that reduced pyruvate-supported oxygen consumption in mutant *Drosophila* is associated  
772 with a compensating increase by proline dehydrogenase to mitochondrial respiration (Simard et al.,  
773 2020a; Simard et al., 2020b). Similarly, decreased mitochondrial respiration at the level of complex  
774 I in mutant *Drosophila* was associated with an increase in the mitochondrial G3P oxidation,  
775 compensating for complex I deficiency (Pichaud et al., 2019). Our data suggest that the same  
776 reactions are important when CI-OXPHOS is reduced by heat stress in *Drosophila*.

777 In the model simulations from Zieliński et al. (2016) the ATP production was somewhat  
778 reduced when G3P and proline were used as alternative substrates since these reactions do not  
779 contribute directly to the proton gradient (only indirectly through complex III and IV through the

780 downstream ubiquinone pool). Considering the failure of complex I to support the proton gradient  
781 at high temperature, it is possible that the sustained oxygen consumption rates at high temperatures  
782 are somewhat decoupled to sustained ATP production rates in *Drosophila*. As an example it was  
783 found in the wrasse *Notolabrus celidotus* that respiration through complex I and II in permeabilized  
784 cardiac fibres increased at temperatures above the upper tolerance limit but that the concurrent ATP  
785 production rate plummeted resulting in a lower ATP/O ratio (Iftikar and Hickey, 2013; see also  
786 Chung and Schulte, 2020). The decreased ATP/O coincides with the temperature of acute heart  
787 failure, emphasizing that sustained high mitochondrial oxygen consumption rates may not  
788 necessarily result in efficient energy production. Interestingly, mutants of *D. subobscura* with  
789 reduced activity of complex I (-50%) and complex III (-30%) compared to the wildtype showed  
790 unaltered ATP production, and the authors further found that complex I activity could be inhibited  
791 up to 70% (in wildtype) before any change was observed in OCR and ATP synthesis (Farge et al.,  
792 2002). Further studies should therefore investigate if the characteristic hyperthermic failure of CI-  
793 OXPHOS result in insufficient ATP production or if energy production is well defended at critically  
794 high temperatures.

795 Heat stress also increases the production of reactive oxygen species (ROS), which are  
796 normal by-products of cellular respiration and represent both an important signaling molecule and a  
797 potential source of cellular injury (Abele et al., 2002; Blier et al., 2014; Scialò et al., 2020). For  
798 example, a recent paper showed that limiting ROS produced in brain mitochondria by reverse  
799 electron transport through complex I (ROS-RET) during heat stress in *D. melanogaster* reduced  
800 survival, as ROS-RET activates survival responses (Scialò et al., 2020). On the other hand heat  
801 stress has been found to increase ROS production (Abele et al., 2002; Lopez-Martinez et al., 2008;  
802 Wang et al., 2014; Yang et al., 2010; Zhang et al., 2015). Complex I is normally considered the  
803 main source of ROS (Murphy, 2009) but in *Drosophila*, mtG3PDH is one of the most significant  
804 producers of ROS (Miwa and Brand, 2005; Miwa et al., 2003). Investigating the ROS production at  
805 high temperatures is thus an interesting direction for future studies given the breakdown in CI-  
806 OXPHOS, the resulting increase in relative contribution of mtG3PDH and the sustained high  
807 mitochondrial oxygen consumption rates observed here.

808 In summary, our study shows that mitochondrial oxygen consumption is sustained at  
809 temperatures around and above the species heat tolerance limits, indicating that mitochondria may  
810 be more tolerant than the animal itself, in accordance with previous studies. In all of the tested  
811 species we observed abrupt declines in the OCR supported by complex I substrates, in a pattern that

812 tends to correlate with species heat tolerance. However, the resolution in assay temperatures is not  
813 sufficient to fully discern whether organismal heat tolerance dictates the temperature of CI-  
814 OXPHOS collapse in *Drosophila*. Measurements of enzymatic activity revealed that the complex I  
815 enzyme alone is unlikely to be responsible for the observed decline in CI-OXPHOS. Instead,  
816 upstream enzymes of the substrate oxidation system like the pyruvate dehydrogenase complex and  
817 citrate synthase may potentially limit CI-OXPHOS at high temperatures due to their decline in  
818 activity. Using an alternative SUIIT protocol we also observed that the increased relative reliance on  
819 G3P and proline are largely attributable to a *masking effect* of complex I-supported respiration.  
820 Hence, mitochondrial oxygen consumption persists even at critically high temperatures through the  
821 use of alternative substrates. It is, however, unclear whether this oxygen use is coupled to sufficient  
822 energy production. Future studies should include examination of the ATP production at high  
823 temperature to investigate whether the high mitochondrial oxygen consumption is coupled to energy  
824 production, and further if the oxygen consumption in combination with alternative substrate  
825 pathways and high temperature can result in increased ROS production, ultimately posing an  
826 oxidative stress challenge in *Drosophila* near their upper thermal limit.



827 **Acknowledgements**

828 The authors would like to thank Rebekah Strang and Kirsten Kromand for animal care in Canada  
829 and Denmark, respectively, Professors Angela Fago and Tobias Wang for allowing us to use their  
830 Oroboros systems at Aarhus University, and Dr. Amanda Bundgaard for valuable discussions.

831 **Competing interests**

832 The authors declare no competing or financial interests.

833 **Funding**

834 This research was funded by grants from the Natural Sciences and Engineering Research Council of  
835 Canada (NSERC) (RGPIN-2017-05100) and Université de Moncton (N.P.), and the Danish Council  
836 for Independent Research|Natural Sciences (Det Frie Forskningsråd|Natur og Univers) (J.O.). L.B.J  
837 was supported by a Company of Biologists Travel Fellowship (sponsored by The Journal of  
838 Experimental Biology, JEBTF1905228).

839 **References**

- 840 **Abele, D., Heise, K., Pörtner, H. O. and Puntarulo, S.** (2002). Temperature-dependence of  
841 mitochondrial function and production of reactive oxygen species in the intertidal mud clam *Mya*  
842 *arenaria*. *J. Exp. Biol.* **205**, 1831–1841.
- 843 **Addo-Bediako, A., Chown, S. L. and Gaston, K. J.** (2000). Thermal tolerance, climatic  
844 variability and latitude. *Proc. Biol. Sci.* **267**, 739–745.
- 845 **Beenackers, A. M. T., van der Horst, D. J. and Van Marrewijk, W. J. A.** (1984). Insect flight  
846 muscle metabolism. *Insect Biochem.* **14**, 243–260.
- 847 **Blier, P. U., Lemieux, H. and Pichaud, N.** (2014). Holding our breath in our modern world: will  
848 mitochondria keep the pace with climate changes? *Can. J. Zool.* **92**, 591–601.
- 849 **Bowler, K.** (2018). Heat death in poikilotherms: Is there a common cause? *J. Therm. Biol.* **76**, 77–  
850 79.
- 851 **Bowler, K. and Kashmeery, A. M. S.** (1979). Recovery from heat injury in the blowfly,  
852 *Calliphora erythrocephala*. *J. Therm. Biol.* **4**, 197–202.
- 853 **Bowler, K. and Kashmeery, A. M. S.** (1981). Effects of *in vivo* heating of blowflies on the  
854 oxidative capacity of flight muscle sarcosomes: A differential effect on glycerol 3-phosphate and  
855 pyruvate plus proline respiration. *J. Therm. Biol.* **6**, 11–18.
- 856 **Bursell, E.** (1963). Aspects of the Metabolism of Amino Acids in the tsetse fly, *Glossina* (Diptera).  
857 *J. Insect Physiol.* **9**, 439–452.
- 858 **Bursell, E.** (1981). The Role of Proline in Energy Metabolism. In *Energy Metabolism in Insects*,  
859 pp. 135–154. Boston, MA: Springer US.
- 860 **Candy, D. J., Becker, A. and Wegener, G.** (1997). Coordination and integration of metabolism in  
861 insect flight. *Comp. Biochem. Physiol. - B Biochem. Mol. Biol.* **117**, 497–512.
- 862 **Carmon, A. and MacIntyre, R.** (2010). The  $\alpha$  glycerophosphate cycle in *Drosophila melanogaster*  
863 VI. structure and evolution of enzyme paralogs in the genus *Drosophila*. *J. Hered.* **101**, 225–234.
- 864 **Carmon, A., Chien, J., Sullivan, D. and MacIntyre, R.** (2010). The  $\alpha$  glycerophosphate cycle in  
865 *Drosophila melanogaster* V. Molecular analysis of  $\alpha$  glycerophosphate dehydrogenase and  $\alpha$   
866 glycerophosphate oxidase mutants. *J. Hered.* **101**, 218–224.
- 867 **Chadwick, L. E. and Gilmour, D.** (1940). Respiration during flight in *Drosophila repleta*  
868 Wollaston: the oxygen consumption considered in relation to the wing-rate. *Physiol. Zool.* **13**, 398–  
869 410.
- 870 **Chamberlin, M. E.** (2004). Top-down control analysis of the effect of temperature on ectotherm  
871 oxidative phosphorylation. *Am. J. Physiol. - Regul. Integr. Comp. Physiol.* **287**, 794–800.
- 872 **Chung, D. J. and Schulte, P. M.** (2020). Mitochondria and the thermal limits of ectotherms. *J.*  
873 *Exp. Biol.* **223**, jeb227801.

- 874 **Chung, D. J., Sparagna, G. C., Chicco, A. J. and Schulte, P. M.** (2018). Patterns of  
875 mitochondrial membrane remodeling parallel functional adaptations to thermal stress. *J. Exp. Biol.*  
876 **221**, jeb174458.
- 877 **Cormier, R. P. J., Champigny, C. M., Simard, C. J., St-Coeur, P. D. and Pichaud, N.** (2019).  
878 Dynamic mitochondrial responses to a high-fat diet in *Drosophila melanogaster*. *Sci. Rep.* **9**, 1–11.
- 879 **Dahlhoff, E. and Somero, G. N.** (1993). Kinetic and structural adaptations of cytoplasmic malate  
880 dehydrogenases of eastern Pacific abalone (genus *Haliotis*) from different thermal habitats:  
881 biochemical correlates of biogeographical patterning. *J. Exp. Biol.* **185**, 137–150.
- 882 **Davis, B. Y. R. A. and Fraenkel, G.** (1940). The Oxygen Consumption of Flies During Flight. *J.*  
883 *Exp. Biol.* **17**, 402–407.
- 884 **Davison, T. F. and Bowler, K.** (1971). Changes in the Functional Efficiency of Flight Muscle  
885 Sarcosomes during Heat Death of Adult *Calliphora erythrocephala*. *J. Cell. Physiol.* **78**, 37–48.
- 886 **Ekström, A., Sandblom, E., Blier, P. U., Dupont Cyr, B.-A., Brijs, J. and Pichaud, N.** (2017).  
887 Thermal sensitivity and phenotypic plasticity of cardiac mitochondrial metabolism in European  
888 perch, *Perca fluviatilis*. *J. Exp. Biol.* **220**, 386–396.
- 889 **El-Wadawi, R. and Bowler, K.** (1995). The development of thermotolerance protects blowfly  
890 flight muscle mitochondrial function from heat damage. *J. Exp. Biol.* **198**, 2413–2421.
- 891 **El-Wadawi, R. and Bowler, K.** (1996). The effect of in vivo heat treatments on blowfly flight  
892 muscle mitochondrial function: Effects on partial reactions of the respiratory chain. *J. Therm. Biol.*  
893 **21**, 403–408.
- 894 **Fangue, N. A., Richards, J. G. and Schulte, P. M.** (2009). Do mitochondrial properties explain  
895 intraspecific variation in thermal tolerance? *J. Exp. Biol.* **212**, 514–522.
- 896 **Farge, G., Touraille, S., Debise, R. and Alziari, S.** (2002). The respiratory chain complex  
897 thresholds in mitochondria of a *Drosophila subobscura* mutant strain. *Biochimie* **84**, 1189–1197.
- 898 **Gnaiger, E.** (2014). *Mitochondrial Pathways and Respiratory Control. An Introduction to*  
899 *OXPPOS Analysis*. 4th ed. Innsbruck, Austria: OROBOROS MiPNet Publications.
- 900 **González-Tokman, D., Córdoba-Aguilar, A., Dáttilo, W., Lira-Noriega, A., Sánchez-Guillén,**  
901 **R. A. and Villalobos, F.** (2020). Insect responses to heat: physiological mechanisms, evolution and  
902 ecological implications in a warming world. *Biol. Rev.* **95**, 802–821.
- 903 **Harada, A. E., Healy, T. M. and Burton, R. S.** (2019). Variation in Thermal Tolerance and Its  
904 Relationship to Mitochondrial Function Across Populations of *Tigriopus californicus*. *Front.*  
905 *Physiol.* **10**.
- 906 **Havird, J. C., Shah, A. A. and Chicco, A. J.** (2020). Powerhouses in the cold: mitochondrial  
907 function during thermal acclimation in montane mayflies. *Philos. Trans. R. Soc. Lond. B. Biol. Sci.*  
908 **375**, 20190181.

- 909 **Heinrich, E. C., Gray, E. M., Ossher, A., Meigher, S., Grun, F. and Bradley, T. J.** (2017).  
910 Aerobic function in mitochondria persists beyond death by heat stress in insects. *J. Therm. Biol.* **69**,  
911 267–274.
- 912 **Hilton, Z., Clements, K. D. and Hickey, A. J. R.** (2010). Temperature sensitivity of cardiac  
913 mitochondria in intertidal and subtidal triplefin fishes. *J Comp Physiol B* **180**, 979–990.
- 914 **Hirst, J.** (2010). Towards the molecular mechanism of respiratory complex I. *Biochem. J.* **425**,  
915 327–339.
- 916 **Hochachka, P. W. and Somero, G. N.** (2002). *Biochemical adaptation: mechanism and process in*  
917 *physiological evolution*. New York: Oxford University Press.
- 918 **Hraoui, G., Bettinazzi, S., Gendron, A. D., Boisclair, D. and Breton, S.** (2020). Mitochondrial  
919 thermo-sensitivity in invasive and native freshwater mussels. *J. Exp. Biol.* **223**,.
- 920 **Hunter-Manseau, F., Desrosiers, V., Le François, N. R., Dufresne, F., Detrich, H. W., Nozais,**  
921 **C. and Blier, P. U.** (2019). From Africa to Antarctica: Exploring the Metabolism of Fish Heart  
922 Mitochondria Across a Wide Thermal Range. *Front. Physiol.* **10**,.
- 923 **Iftikar, F. I., MacDonald, J. and Hickey, A. J. R.** (2010). Thermal limits of portunid crab heart  
924 mitochondria: Could more thermo-stable mitochondria advantage invasive species? *J. Exp. Mar.*  
925 *Bio. Ecol.* **395**, 232–239.
- 926 **Iftikar, F. I., MacDonald, J. R., Baker, D. W., Renshaw, G. M. C. and Hickey, A. J. R.** (2014).  
927 Could thermal sensitivity of mitochondria determine species distribution in a changing climate? *J.*  
928 *Exp. Biol.* **217**, 2348–2357.
- 929 **IPCC** (2014). *Climate Change 2014: Synthesis Report. Contribution of Working Groups I, II and*  
930 *III to the Fifth Assessment Report of the Intergovernmental Panel on Climate Change.* (ed. Core  
931 Writing Team), Pachauri, R. K.), and Meyer, L. A.) Geneva, Switzerland: IPCC.
- 932 **Jørgensen, L. B., Malte, H. and Overgaard, J.** (2019). How to assess *Drosophila* heat tolerance:  
933 Unifying static and dynamic tolerance assays to predict heat distribution limits. *Funct. Ecol.* **33**,  
934 629–642.
- 935 **Kake-Guena, S. A., Touisse, K., Warren, B. E., Scott, K. Y., Dufresne, F., Blier, P. U. and**  
936 **Lemieux, H.** (2017). Temperature-related differences in mitochondrial function among clones of  
937 the cladoceran *Daphnia pulex*. *J. Therm. Biol.* **69**, 23–31.
- 938 **Kellermann, V., Overgaard, J., Hoffmann, A. A., Fløjgaard, C., Svenning, J.-C. and**  
939 **Loescheke, V.** (2012). Upper thermal limits of *Drosophila* are linked to species distributions and  
940 strongly constrained phylogenetically. *Proc. Natl. Acad. Sci. U. S. A.* **109**, 16228–16233.
- 941 **Kingsolver, J. G., Diamond, S. E. and Buckley, L. B.** (2013). Heat stress and the fitness  
942 consequences of climate change for terrestrial ectotherms. *Funct. Ecol.* **27**, 1415–1423.
- 943 **Klok, C. J.** (2004). Upper thermal tolerance and oxygen limitation in terrestrial arthropods. *J. Exp.*  
944 *Biol.* **207**, 2361–2370.

- 945 **Kovac, H., Käfer, H., Stabentheiner, A. and Costa, C.** (2014). Metabolism and upper thermal  
946 limits of *Apis mellifera carnica* and *A. m. ligustica*. *Apidologie* **45**, 664–677.
- 947 **Krogh, A. and Weis-Fogh, T.** (1951). The respiratory exchange of the desert locust (*Schistocerca*  
948 *gregaria*) before, during and after flight. *J. Exp. Biol.* **28**, 344–357.
- 949 **Kuznetsov, A. V, Veksler, V., Gellerich, F. N., Saks, V., Margreiter, R. and Kunz, W. S.**  
950 (2008). Analysis of mitochondrial function *in situ* in permeabilized muscle fibers, tissues and cells.  
951 *Nat. Protoc.* **3**, 965–976.
- 952 **Lemieux, H., Tardif, J. C. and Blier, P. U.** (2010a). Thermal sensitivity of oxidative  
953 phosphorylation in rat heart mitochondria: Does pyruvate dehydrogenase dictate the response to  
954 temperature? *J. Therm. Biol.* **35**, 105–111.
- 955 **Lemieux, H., Tardif, J.-C., Dutil, J.-D. and Blier, P. U.** (2010b). Thermal sensitivity of cardiac  
956 mitochondrial metabolism in an ectothermic species from a cold environment, Atlantic wolffish  
957 (*Anarhichas lupus*). *J. Exp. Mar. Bio. Ecol.* **384**, 113–118.
- 958 **Lenth, R.** (2019). emmeans: Estimated Marginal Means, aka Least-Squares Means.
- 959 **Lopez-Martinez, G., Elnitsky, M. A., Benoit, J. B., Lee, R. E. and Denlinger, D. L.** (2008).  
960 High resistance to oxidative damage in the Antarctic midge *Belgica antarctica*, and  
961 developmentally linked expression of genes encoding superoxide dismutase, catalase and heat  
962 shock proteins. *Insect Biochem. Mol. Biol.* **38**, 796–804.
- 963 **Martinez, E., Hendricks, E., Menze, M. A. and Torres, J. J.** (2016). Physiological performance  
964 of warm-adapted marine ectotherms: Thermal limits of mitochondrial energy transduction  
965 efficiency. *Comp. Biochem. Physiol. -Part A Mol. Integr. Physiol.* **191**, 216–225.
- 966 **McDonald, A. E., Pichaud, N. and Darveau, C. A.** (2018). “Alternative” fuels contributing to  
967 mitochondrial electron transport: Importance of non-classical pathways in the diversity of animal  
968 metabolism. *Comp. Biochem. Physiol. Part - B Biochem. Mol. Biol.* **224**, 185–194.
- 969 **Miwa, S. and Brand, M. D.** (2005). The topology of superoxide production by complex III and  
970 glycerol 3-phosphate dehydrogenase in *Drosophila* mitochondria. *Biochim. Biophys. Acta -*  
971 *Bioenerg.* **1709**, 214–219.
- 972 **Miwa, S., St-Pierre, J., Partridge, L. and Brand, M. D.** (2003). Superoxide and hydrogen  
973 peroxide production by *Drosophila* mitochondria. *Free Radic. Biol. Med.* **35**, 938–948.
- 974 **Mölich, A. B., Förster, T. D. and Lighton, J. R. B.** (2013). Hyperthermic Overdrive: Oxygen  
975 Delivery does Not Limit Thermal Tolerance in *Drosophila melanogaster*. *J. Insect Sci.* **12**, 1–7.
- 976 **Murphy, M. P.** (2009). How mitochondria produce reactive oxygen species. *Biochem. J.* **417**, 1–  
977 13.
- 978 **Neven, L. G.** (2000). Physiological responses of insects to heat. *Postharvest Biol. Technol.* **21**,  
979 103–111.

- 980 **Olembo, N. K. and Pearson, D. J.** (1982). Changes in the contents of intermediates of proline and  
981 carbohydrate metabolism in flight muscle of the tsetse fly *Glossina morsitans* and the fleshfly  
982 *Sarcophaga tibialis*. *Insect Biochem.* **12**, 657–662.
- 983 **Pichaud, N., Chatelain, E. H., Ballard, J. W. O., Tanguay, R., Morrow, G. and Blier, P. U.**  
984 (2010). Thermal sensitivity of mitochondrial metabolism in two distinct mitotypes of *Drosophila*  
985 *simulans*: evaluation of mitochondrial plasticity. *J. Exp. Biol.* **213**, 1665–1675.
- 986 **Pichaud, N., Ballard, J. W. O., Tanguay, R. M. and Blier, P. U.** (2011). Thermal sensitivity of  
987 mitochondrial functions in permeabilized muscle fibers from two populations of *Drosophila*  
988 *simulans* with divergent mitotypes. *AJP Regul. Integr. Comp. Physiol.* **301**, R48–R59.
- 989 **Pichaud, N., Ballard, J. W. O., Tanguay, R. M. and Blier, P. U.** (2012). Naturally occurring  
990 mitochondrial DNA haplotypes exhibit metabolic differences: insight into functional properties of  
991 mitochondria. *Evolution (N. Y.)*. **66**, 3189–3197.
- 992 **Pichaud, N., Ballard, J. W. O., Tanguay, R. M. and Blier, P. U.** (2013). Mitochondrial haplotype  
993 divergences affect specific temperature sensitivity of mitochondrial respiration. *J Bioenerg*  
994 *Biomembr* **45**, 25–35.
- 995 **Pichaud, N., Bérubé, R., Côté, G., Belzile, C., Dufresne, F., Morrow, G., Tanguay, R. M.,**  
996 **Rand, D. M. and Blier, P. U.** (2019). Age Dependent Dysfunction of Mitochondrial and ROS  
997 Metabolism Induced by Mitonuclear Mismatch. *Front. Genet.* **10**, 1–12.
- 998 **Pobezhimova, T., Voinikov, V. and Varakina, N.** (1996). Inactivation of complex I of the  
999 respiratory chain of maize mitochondria incubated *in vitro* by elevated temperature. *J. Therm. Biol.*  
1000 **21**, 283–288.
- 1001 **R Core Team** (2019). R: A Language and Environment for Statistical Computing.
- 1002 **Riddles, P. W., Blakeley, R. L. and Zerner, B.** (1979). Ellman's reagent: 5,5'-dithiobis(2-  
1003 nitrobenzoic acid) - a reexamination. *Anal. Biochem.* **94**, 75–81.
- 1004 **Sacktor, B.** (1955). Cell structure and the metabolism of insect flight muscle. *J. Biophys. Biochem.*  
1005 *Cytol.* **1**, 29–46.
- 1006 **Sacktor, B.** (1975). Biochemistry of Insect Flight. In *Insect Biochemistry and Function* (ed. Candy,  
1007 D. J.) and Kilby, B. A.), pp. 89–176. London: Chapman and Hall.
- 1008 **Sacktor, B. and Childress, C. C.** (1967). Metabolism of proline in insect flight muscle and its  
1009 significance in stimulating the oxidation of pyruvate. *Arch. Biochem. Biophys.* **120**, 583–588.
- 1010 **Schmidt-Nielsen, K.** (1990). *Animal Physiology: Adaptation and environment*. 4th ed. Cambridge:  
1011 Cambridge University Press.
- 1012 **Schulte, P. M.** (2015). The effects of temperature on aerobic metabolism: towards a mechanistic  
1013 understanding of the responses of ectotherms to a changing environment. *J. Exp. Biol.* **218**, 1856–  
1014 1866.

- 1015 **Scialò, F., Sriram, A., Stefanatos, R., Spriggs, R. V., Loh, S. H. Y., Martins, L. M. and Sanz,**  
1016 **A.** (2020). Mitochondrial complex I derived ROS regulate stress adaptation in *Drosophila*  
1017 *melanogaster*. *Redox Biol.* **32**, 101450.
- 1018 **Simard, C. J., Pelletier, G., Boudreau, L. H., Hebert-chatelain, E. and Pichaud, N.** (2018).  
1019 Measurement of mitochondrial oxygen consumption in permeabilized fibers of *Drosophila* using  
1020 minimal amounts of tissue. *J. Vis. Exp.* **134**, e57376.
- 1021 **Simard, C. J., Touaibia, M., Allain, E. P., Hebert-Chatelain, E. and Pichaud, N.** (2020a). Role  
1022 of the Mitochondrial Pyruvate Carrier in the Occurrence of Metabolic Inflexibility in *Drosophila*  
1023 *melanogaster* Exposed to Dietary Sucrose. *Metabolites* **10**, 411.
- 1024 **Simard, C., Lebel, A., Allain, E. P., Touaibia, M., Hebert-Chatelain, E. and Pichaud, N.**  
1025 (2020b). Metabolic Characterization and Consequences of Mitochondrial Pyruvate Carrier  
1026 Deficiency in *Drosophila melanogaster*. *Metabolites* **10**, 363.
- 1027 **Smith, P. K., Krohn, R. I., Hermanson, G. T., Mallia, A. K., Gartner, F. H., Provenzano, M.**  
1028 **D., Fujimoto, E. K., Goeke, N. M., Olson, B. J. and Klenk, D. C.** (1985). Measurement of protein  
1029 using bicinchoninic acid. *Anal. Biochem.* **150**, 76–85.
- 1030 **Soares, J. B. R. C., Gaviraghi, A. and Oliveira, M. F.** (2015). Mitochondrial Physiology in the  
1031 Major Arbovirus Vector *Aedes aegypti*: Substrate Preferences and Sexual Differences Define  
1032 Respiratory Capacity and Superoxide Production. *PLoS One* **10**, 1–35.
- 1033 **Stork, N. E.** (2018). How Many Species of Insects and Other Terrestrial Arthropods Are There on  
1034 Earth? *Annu. Rev. Entomol.* **63**, 31–45.
- 1035 **Sunday, J. M., Bates, A. E. and Dulvy, N. K.** (2012). Thermal tolerance and the global  
1036 redistribution of animals. *Nat. Clim. Chang.* **2**, 686–690.
- 1037 **Sunday, J., Bennett, J. M., Calosi, P., Clusella-Trullas, S., Gravel, S., Hargreaves, A. L.,**  
1038 **Leiva, F. P., Verberk, W. C. E. P., Olalla-Tárraga, M. Á. and Morales-Castilla, I.** (2019).  
1039 Thermal tolerance patterns across latitude and elevation. *Philos. Trans. R. Soc. B Biol. Sci.* **374**,  
1040 20190036.
- 1041 **Syromyatnikov, M. Y., Gureev, A. P., Vitkalova, I. Y., Starkov, A. A. and Popov, V. N.** (2019).  
1042 Unique features of flight muscles mitochondria of honey bees (*Apis mellifera* L.). *Arch. Insect*  
1043 *Biochem. Physiol.* **102**, 1–14.
- 1044 **Teulier, L., Weber, J. M., Crevier, J. and Darveau, C. A.** (2016). Proline as a fuel for insect  
1045 flight: Enhancing carbohydrate oxidation in hymenopterans. *Proc. R. Soc. B Biol. Sci.* **283**,
- 1046 **Verberk, W. C. E. P., Overgaard, J., Ern, R., Bayley, M., Wang, T., Boardman, L. and**  
1047 **Terblanche, J. S.** (2015). Does oxygen limit thermal tolerance in arthropods? A critical review of  
1048 current evidence. *Comp. Biochem. Physiol. A. Mol. Integr. Physiol.*
- 1049 **Wang, H., Fang, Y., Wang, L., Zhu, W., Ji, H., Wang, H., Xu, S. and Sima, Y.** (2014).  
1050 Transcriptome analysis of the *Bombyx mori* fat body after constant high temperature treatment  
1051 shows differences between the sexes. *Mol. Biol. Rep.* **41**, 6039–6049.

- 1052 **Weis-Fogh, T.** (1964). Diffusion in Insect Wing Muscle, the Most Active Tissue Known. *J. Exp.*  
1053 *Biol.* **41**, 229–256.
- 1054 **Yang, L. H., Huang, H. and Wang, J. J.** (2010). Antioxidant responses of citrus red mite,  
1055 *Panonychus citri* (McGregor) (Acari: Tetranychidae), exposed to thermal stress. *J. Insect Physiol.*  
1056 **56**, 1871–1876.
- 1057 **Zhang, S., Fu, W., Li, N., Zhang, F. and Liu, T. X.** (2015). Antioxidant responses of *Propylaea*  
1058 *japonica* (Coleoptera: Coccinellidae) exposed to high temperature stress. *J. Insect Physiol.* **73**, 47–  
1059 52.
- 1060 **Zieliński, L. P., Smith, A. C., Smith, A. G. and Robinson, A. J.** (2016). Metabolic flexibility of  
1061 mitochondrial respiratory chain disorders predicted by computer modelling. *Mitochondrion* **31**, 45–  
1062 55.
- 1063
